1 **Functional and structural features of L2/3 pyramidal cells continuously covary with**  
2 **pial depth in mouse visual cortex**

3 **Simon Weiler<sup>\*1,2,3</sup>, Drago Guggiana Nilo<sup>\*1</sup>, Tobias Bonhoeffer<sup>1</sup>, Mark Hübener<sup>1</sup>, Tobias**  
4 **Rose<sup>1,4</sup>, Volker Scheuss<sup>\*\*1,5</sup>**

5 <sup>1</sup> Max Planck Institute of Neurobiology, Am Klopferspitz 18, 82152 Martinsried, Germany

6 <sup>2</sup> Graduate School of Systemic Neurosciences, Ludwig-Maximilians-Universität München,  
7 Großhaderner Str. 2, 82152 Planegg, Germany

8 <sup>3</sup> *current address*: Sainsbury Wellcome Centre for Neural Circuits and Behaviour, University  
9 College London, 25 Howland Street, London W1T 4JG, United Kingdom

10 <sup>4</sup> *current address*: Institute for Experimental Epileptology and Cognition Research, University  
11 of Bonn, Venusberg-Campus 1, 53127 Bonn, Germany

12 <sup>5</sup> *current address*: Department of Psychiatry, Ludwig-Maximilians-Universität München,  
13 Nussbaumstr. 7, 80336 München, Germany

14 \* equal contribution

15 \*\*corresponding author: Volker Scheuss ([volker.scheuss@med.uni-muenchen.de](mailto:volker.scheuss@med.uni-muenchen.de)).

16 Keywords: L2/3 pyramidal cells, sensory cortex, visual cortex, cortical depth, pial depth,  
17 dendritic morphology, intrinsic electrophysiological properties, synaptic connectivity, cortical  
18 circuit, laser-scanning photostimulation, continuum, clusters, calcium imaging, *in vivo* 2-  
19 photon imaging

20  
21 **Declaration of interest**

22 The authors declare no competing interests.

23  
24 **Acknowledgements**

25 We are grateful to Volker Staiger for cell tracing as well as technical support, to Michael Myoga  
26 for helping to build one *in vitro* setup and to Pieter Goltstein for software. This study was  
27 supported by the Max Planck Society and the German Research Foundation (DFG, the  
28 Collaborative Research Center SFB870\_A08, reference number 118803580; V.S. and M.H.).

## 31 **Abstract**

32

33 Pyramidal cells of neocortical layer 2/3 (L2/3 PyrCs) integrate signals from numerous brain  
34 areas and project throughout the neocortex. Within L2/3, PyrCs show functional and structural  
35 specializations depending on their pial depth, indicating participation in different functional  
36 microcircuits. However, it is unknown whether these depth-dependent differences result from  
37 separable L2/3 PyrC subtypes or whether functional and structural features represent a  
38 continuum while correlating with pial depth. Here, we assessed the stimulus selectivity,  
39 electrophysiological properties, dendritic morphology, and excitatory and inhibitory synaptic  
40 connectivity across the depth of L2/3 in the binocular visual cortex (bV1) of female mice. We  
41 find that the structure of the apical but not the basal dendritic tree varies with pial depth, which  
42 is accompanied by differences in passive but not active electrophysiological properties. PyrCs  
43 in lower L2/3 receive increased excitatory and inhibitory input from L4, while upper L2/3 PyrCs  
44 receive a larger proportion of intralaminar input. Complementary *in vivo* calcium imaging  
45 revealed a systematic change in visual responsiveness, with deeper L2/3 PyrCs showing more  
46 robust responses than superficial PyrCs. Furthermore, deeper L2/3 PyrCs are more strongly  
47 driven by contralateral than ipsilateral eye stimulation. In contrast, orientation- and direction-  
48 selectivity of L2/3 PyrCs are not dependent on pial depth. Importantly, the transitions of the  
49 various properties are gradual, and cluster analysis does not support the classification of L2/3  
50 PyrCs into discrete subtypes. These results show that L2/3 PyrCs' multiple functional and  
51 structural properties systematically correlate with their depth within L2/3, forming a continuum  
52 rather than representing discrete subtypes.

53

54

55

## 56 **SIGNIFICANCE STATEMENT**

57

58 Neocortical pyramidal cells in layer 2/3 (L2/3 PyrCs) are crucial for cortical computation and  
59 display heterogenous properties. We investigated whether and how these properties vary  
60 across the depth of L2/3 and whether L2/3 PyrCs can be subdivided into distinct subtypes.  
61 This is important for a better understanding of the coding strategy and information integration  
62 processes within L2/3. We find that multiple properties such as morphology, physiology,  
63 connectivity, and functional *in vivo* responses of L2/3 PyrCs correlate with cortical depth in  
64 mouse visual cortex. These variations are continuous and do not support classification of L2/3  
65 PyrCs into discrete subtypes. In contrast to L5 and L6, PyrCs in L2/3 therefore process  
66 information based on a continuous property space.

67

68

## 69 Introduction

70 The mammalian neocortex processes signals in local microcircuits and integrates information  
71 from different brain regions across its layers. Excitatory pyramidal cells of layer 2/3 (L2/3  
72 PyrCs) are cortico-cortical projection neurons that exchange information with other neocortical  
73 areas. These cells link the main input and output layers of the neocortical circuit (L4, L5/L6)  
74 and are therefore a key element in cortical information processing (reviewed in Petersen &  
75 Crochet, 2013).

76  
77 It is well established that neocortical PyrCs are heterogenous with respect to their genetic  
78 profiles, morphological and electrophysiological properties, circuit connectivity, and *in vivo*  
79 functional response properties (Harris and Shepherd, 2015). In the infragranular layers,  
80 several PyrC subtypes have been defined based on specific distinctions in these properties,  
81 and such subtypes are thought to form important building blocks for neocortical computations  
82 (Vélez-Fort et al., 2014; Kim et al., 2015). This is different in layer 2/3: although PyrCs in L2/3  
83 have been categorized based on single features such as transcriptional profile, morphology  
84 or physiology alone, multi-feature clustering has not revealed unambiguous PyrC subtypes in  
85 this layer so far (Tasic et al., 2016; Meng et al., 2017; Gouwens et al., 2019; Scala et al.,  
86 2021).

87  
88 This suggests that, rather than originating from discrete, spatially intermingled neuronal  
89 subtypes, functional and structural features of L2/3 PyrCs may vary continuously or follow  
90 larger scale anatomical gradients, like cortical depth. Indeed, structural, molecular and  
91 functional characteristics of L2/3 neurons were found to vary with distance from pia (Kreile et  
92 al., 2011; Staiger et al., 2015; Tasic et al., 2016; Gouwens et al., 2019; O'Herron et al., 2020).  
93 In mouse visual cortex, individual L2/3 PyrCs are selectively tuned to distinct visual features,  
94 such as orientation and direction (Niell and Stryker, 2008; Andermann et al., 2011; Marshel et  
95 al., 2011), and continuous depth-dependent changes in these properties have been reported  
96 (O'Herron et al., 2020). It was also shown that, similar to other sensory cortical areas (Tasic  
97 et al., 2018; Yao et al., 2021), the genetic makeup of PyrCs in the superficial part of L2/3  
98 differs from other L2/3 PyrCs in primary visual cortex (V1) (Tasic et al., 2016), further  
99 suggesting that L2/3 is not a functionally homogenous layer. Likewise, morphological and  
100 physiological properties are different in the upper compared to the lower part of L2/3 (Gouwens  
101 et al., 2019). Additionally, the long-range outputs of L2/3 PyrCs have been shown to vary  
102 across L2/3: PyrCs in V1 projecting to specific higher visual areas, such as the anterolateral  
103 (AL) or posteromedial (PM) area, reside at different cortical depths (Kim et al., 2020).

104 Interestingly, these cells do not differ in their electrophysiological properties (Kim et al., 2018)  
105 and mostly share the same transcriptome (Kim et al., 2020).

106 Apart from the influence of morphological and electrophysiological characteristics, the visual  
107 response properties of L2/3 PyrCs derive from integration of their synaptic inputs within the  
108 cortical circuit. Locally, L2/3 PyrCs receive their input through intra- as well as interlaminar  
109 excitatory and inhibitory connections, the latter originating from L4 and L5 in mouse V1 (Kätzel  
110 et al., 2011; Xu et al., 2016). In particular, interactions between excitatory and inhibitory  
111 presynaptic inputs play an important role in shaping the functional response properties of  
112 individual L2/3 PyrCs (Rossi et al., 2020). The variance of L2/3 PyrC morphology with pial-  
113 depth (Gouwens et al., 2019) together with the fact that different types of inputs target different  
114 subcellular compartments (Petreanu et al., 2009) suggests that L2/3 connectivity within the  
115 local circuit also depends on pial depth. In rodent somatosensory and auditory cortex such  
116 relationship has been observed (Staiger et al., 2015; Meng et al., 2017), where neurons in the  
117 superficial compared to the deeper part of L2/3 differ in the amount of input from specific layers  
118 and in the horizontal extent from where inputs arise. It remains to be explored whether such  
119 depth-dependent variations in intra- and interlaminar connections exist in other sensory  
120 cortical areas, and whether these input changes are continuous or discrete within L2/3.

121  
122 Taken together, it is still unclear whether information is processed by discrete L2/3 PyrC  
123 subtypes or by a continuum of neurons with a gradually varying feature set. Furthermore, it  
124 remains to be established to which extent L2/3 should be considered a uniform layer and if  
125 neuronal properties change with pial depth. Therefore, a systematic approach taking into  
126 account multiple structural and functional features of PyrCs across the full extent of L2/3 is  
127 needed to better understand the organization of this layer. We therefore assessed how the  
128 morpho-electric properties, intra- and interlaminar input connectivity, and visual response  
129 properties of excitatory L2/3 neurons are distributed, and how they relate to pial depth. We  
130 find that the apical dendritic architecture, the passive intrinsic properties, and the local input  
131 sources to L2/3 PyrCs vary systematically with depth. This is accompanied by gradual  
132 changes in visual response properties, arguing for a gradually changing microcircuit within  
133 L2/3. Finally, the distributions of these features do not support clustering of cells into discrete  
134 subtypes, but rather argue for a functional continuum of L2/3 PyrCs.

135

136

## 137 **Methods**

138

### 139 *Animals*

140 All experimental procedures were carried out in compliance with institutional guidelines of the  
141 Max Planck Society and the local government (Regierung von Oberbayern). Wild type C57bl/6  
142 female mice (postnatal days P27-P70) were used. Mice were housed under a 12 h light-dark  
143 cycle with food and water available ad libitum. *In vitro* brain slice experiments were performed  
144 at P30-P70. Craniotomy, virus injections and head plate implantation were performed at P30-  
145 P35. *In vivo* imaging was performed at P50-P70. Animals were usually group housed. After  
146 cranial window and head plate implantation animals were singly housed. All the experiments  
147 were performed during the dark cycle of the animals.

148

### 149 *Solutions*

150 The cutting solution for *in vitro* experiments contained 85 mM NaCl, 75 mM sucrose, 2.5 KCl,  
151 24 mM glucose, 1.25 mM NaH<sub>2</sub>PO<sub>4</sub>, 4 mM MgCl<sub>2</sub>, 0.5 mM CaCl<sub>2</sub> and 24 mM NaHCO<sub>3</sub> (310-  
152 325 mOsm, bubbled with 95% (vol/vol) O<sub>2</sub>, 5% (vol/vol) CO<sub>2</sub>). Artificial cerebrospinal fluid  
153 (ACSF) contained 127 mM NaCl, 2.5 mM KCl, 26 mM NaHCO<sub>3</sub>, 2 mM CaCl<sub>2</sub>, 2 mM MgCl<sub>2</sub>,  
154 1.25 mM NaH<sub>2</sub>PO<sub>4</sub> and 10 mM glucose (305-315 mOsm, bubbled with 95% (vol/vol) O<sub>2</sub>, 5%  
155 (vol/vol) CO<sub>2</sub>). Caesium-based internal solution contained 122 mM CsMeSO<sub>4</sub>, 4 mM MgCl<sub>2</sub>,  
156 10 mM HEPES, 4 mM Na-ATP, 0.4 mM Na-GTP, 3 mM Na-L-ascorbate, 10 mM Na-  
157 phosphocreatine, 0.2 mM EGTA, 5 mM QX-314, and 0.03 mM Alexa 594 (pH 7.25, 295-300  
158 mOsm). K-based internal solution contained 126 mM K-gluconate, 4 mM KCl, 10 mM HEPES,  
159 4 mM Mg-ATP, 0.3 mM Na-GTP, 10 mM Na-phosphocreatine, 0.3-0.5% (wt/vol) Neurobiotin  
160 tracer and 0.03 mM Alexa 594 (pH 7.25, 295-300 mOsm).

161

### 162 *Acute brain slice preparation*

163 The detailed procedure is described elsewhere (Weiler et al., 2018). Briefly, mice were deeply  
164 anesthetized with Isoflurane in a sealed container and rapidly decapitated. Coronal sections  
165 of V1 (320 µm, Bregma -1.5 to -3) were cut in ice cold carbogenated cutting solution using a  
166 vibratome (VT1200S, Leica). Slices were incubated in cutting solution in a submerged  
167 chamber at 34°C for at least 45 min and then transferred to ACSF in a light-shielded  
168 submerged chamber at room temperature (21°C) until used for recordings. Brain slices were  
169 used for up to 6 hours. A single brain slice was mounted on a *poly-D-lysine coated* coverslip  
170 and then transferred to the recording chamber of the microscope while keeping track of the  
171 rostro-caudal orientation of the slice.

172

173

174 *Laser Scanning Photostimulation (LSPS)*

175 For uncaging experiments using UV laser light, two different setups were used. Coronal brain  
176 slices were visualized with an upright microscope (setup A: BW51X, Olympus; setup B: A-  
177 scope, Thorlabs) using infrared Dodt gradient contrast (DGC) with a low magnification UV  
178 transmissive objective (4x objective lens) and images were acquired by a high-resolution  
179 digital CCD camera. MNI-caged-L-glutamate concentration was 0.2 mM. The bath solution  
180 was replaced after 3 h of recording, and bath evaporation was counterbalanced by constantly  
181 adding a small amount of distilled H<sub>2</sub>O to the solution reservoir using a perfusor. L2/3 PyrCs  
182 in bV1 were targeted using morphological landmarks and then whole cell recordings were  
183 performed at high magnification using a 60x objective. Targeted PyrC bodies were at least 50  
184 μm below the slice surface. Borosilicate glass patch pipettes (resistance of 4-5 MΩ) were filled  
185 with a Cs-based internal solution for measuring excitatory and inhibitory postsynaptic currents  
186 (EPSC: voltage clamp at -70 mV, IPSC: voltage clamp at 0-5 mV). Electrodes also contained  
187 30 μM Alexa 594 for detailed morphological visualization using 2-photon microscopy. Once  
188 stable whole-cell recordings were obtained with good access resistance (< 30 MΩ) the  
189 microscope objective was switched from 60x to 4x. Mapping experiments were controlled with  
190 Ephus software (Suter et al., 2010). The slice was positioned within the CCD camera's field  
191 of view and a stimulus grid (16 x 16 with 69 μm spacing) was aligned to the recorded cell's  
192 soma and the pial surface. Multiple maps were recorded with grid locations stimulated in a  
193 pseudo-random fashion (1 ms pulses, 10-15 mW in the specimen plane, 1s interstimulus  
194 interval, 2-3 repetitions each with different mapping sequence) for both excitatory and  
195 inhibitory inputs.

196 On setup A, a diode-pumped solid state (DPSS laser Inc.) laser was used to generate 355 nm  
197 UV laser pulses for glutamate uncaging. The duration and intensity of the laser pulses were  
198 controlled by an electro-optical modulator, a neutral density filter wheel and a mechanical  
199 shutter. The laser beam was scanned using voltage-controlled mirror galvanometers. An UV-  
200 sensitive photodiode measured the power of the UV laser beam. A dichroic mirror reflected  
201 the UV beam into the optical axis of the microscope while transmitting visible light for capturing  
202 bright-field images by the CCD camera. The beam passed a tube/scan lens pair in order to  
203 underfill the back aperture of the 4x mapping objective resulting in a pencil-shaped beam.

204 On setup B, the UV laser was an Explorer One 355-1 (Newport Spectra-Physics). The duration  
205 and intensity of the laser pulses were directly controlled using analog signals, the built-in  
206 software L-Win (Newport Spectra-Physics), a mechanical shutter and neutral density filters.  
207 An UV-sensitive photodiode measured the power of the UV laser beam.

208 Data were acquired with Multiclamp 700 B amplifiers (Axon instruments). Voltage clamp  
209 recordings were filtered at 4-8 kHz and digitized at 10 kHz. Data Analysis was performed using  
210 custom-written software in MATLAB. The spatial resolution of photostimulation was estimated

211 using excitation profiles (Shepherd and Svoboda, 2005). Excitation profiles describe the  
212 spatial resolution of uncaging sites that generate action potentials in stimulated neurons. For  
213 this, excitatory as well as inhibitory cells in different layers of bV1 were recorded either in  
214 whole-cell or cell-attached configuration using a K-based internal solution in current-clamp  
215 mode. Mapping was performed as described above only that the stimulus grid was 8x8 or  
216 8x16 with 50 or 69  $\mu\text{m}$  spacing. The spatial resolution was 60-100  $\mu\text{m}$  depending on cell type  
217 and layer (data not shown).

218

### 219 *Intrinsic properties measurements*

220 K-based internal solution was used when recording passive and active electrophysiological  
221 properties. Once stable whole-cell recordings were obtained with good access resistance  
222 (usually  $< 30 \text{ M}\Omega$ ) basic electrophysiological properties were examined in current-clamp mode  
223 with 1 s long hyper- and depolarizing current injections.

224

### 225 *Image acquisition for morphological imaging*

226 The patch pipette was carefully retracted from the cell after successful recording and filling  
227 with Alexa-594. A detailed structural 2-photon image stack of the dendritic morphology of the  
228 entire cell was acquired with excitation light of  $\lambda=810 \text{ nm}$  using ScanImage 4.2 (Pologruto et  
229 al., 2003). The structural image stacks typically consisted of 250 sections (1024 x 1024 pixels;  
230 0.3-0.8  $\mu\text{m}$  per pixel) collected in z steps of 1-2  $\mu\text{m}$ .

231

### 232 *Virus dilution, injection and chronic window preparation*

233 The detailed procedure is described elsewhere (Weiler et al., 2018). To co-express the  
234 genetically encoded calcium indicator GCaMP6m together with the structural marker mRuby2  
235 (Rose et al., 2016) in a sparse subset of L2/3 neurons, the adeno-associated virus AAV2/1-  
236 Syn-FLEX-mRuby2-CSG-P2A-GCaMP6m-WPRE-SV40 (titer:  $2.9 \times 10^{13}$  GC per ml, Addgene  
237 accession no. 102816) in combination with AAV2/1.CamKII0.4.Cre.SV40 (titer:  $1.8 \times 10^{13}$  GC  
238 per ml, University of Pennsylvania Vector Core accession no. AV-1-PV2396) were used. The  
239 final titer of AAV2/1-Syn-FLEX-mRuby2-CSG-P2A-GCaMP6m-WPRE-SV40 was  $1.4 \times 10^{13}$   
240 GC per ml (PBS was used for dilution).

241 Briefly, surgeries were performed on 32 female C57bl/6 mice that were intraperitoneally (i.p.)  
242 anesthetized with a mixture of Fentanyl ( $0.05 \text{ mg kg}^{-1}$ ), Midazolam ( $5 \text{ mg kg}^{-1}$ ) and  
243 Medetomidine ( $0.5 \text{ mg kg}^{-1}$ ). Additional analgesic drugs applied were Carprofen ( $5 \text{ mg kg}^{-1}$ ,  
244 subcutaneous, s.c.) before surgery and Lidocaine (10%, topical to skin prior to incision). A  
245 section of skin over the right hemisphere starting from the dorsal scalp was removed and the  
246 underlying periosteum was carefully removed. A custom-machined aluminum head bar (oval  
247 shape, with an 8 mm opening and two screw notches) was carefully placed and angled over

248 the binocular zone of the primary visual area. The precise location of the binocular zone was  
249 determined by intrinsic optical signal (IOS) imaging through the intact skull prior to the  
250 craniotomy in each animal (see section below). A circular craniotomy (4 mm diameter)  
251 centered over the binocular zone of the right primary visual cortex was performed. The  
252 premixed virus was injected 200-500  $\mu\text{m}$  below the pial surface at a single site in the binocular  
253 zone of V1 (50-100 nl/injection,  $\sim 10$  nl/min ejected by pressure pulses at 0.2 Hz) using glass  
254 pipettes and a pressure micro injection system. Additionally, diluted fluorescent retrobeads  
255 (1:20 with cortex buffer, Lumafluor Inc.) were pressure injected (10-20 nl/injection, 5 nl/min)  
256 medial and lateral to the virus injection site at  $\sim 1500$   $\mu\text{m}$  from its center. The craniotomy was  
257 covered with a glass cover slip and was sealed flush with drops of histoacryl. The head bar  
258 and cover glass were then further stabilized by dental cement. After surgery, the animal was  
259 injected s.c. with saline (500  $\mu\text{l}$ ) and the anesthesia was antagonized by i.p. injection of  
260 Naloxone (1.2 mg  $\text{kg}^{-1}$ ), Flumazenil (0.5 mg  $\text{kg}^{-1}$ ) and Atipamezole (2.5 mg  $\text{kg}^{-1}$ ). Carprofen (5  
261 mg  $\text{kg}^{-1}$ , subcutaneous, s.c.) was administered the following two days. *In vivo* imaging was  
262 performed not earlier than 2 weeks after virus injection to allow for sufficient indicator  
263 expression.

264

#### 265 *Intrinsic optical signal imaging*

266 For IOS imaging, the optical axis was orthogonal to the head bar. The brain surface was first  
267 illuminated with light of 530 nm to visualize the blood vessel pattern and subsequently with  
268 735 nm for intrinsic imaging in order to localize bV1. Images were acquired using a 4x air  
269 objective (NA 0.28, Olympus) and a CCD camera (12 bit, 250x348 pixel, 40 Hz). The camera  
270 was focused  $\sim 500$   $\mu\text{m}$  below the pial surface. Image acquisition and analysis software were  
271 custom-written in MATLAB. The visual stimulus was a patch with a size of  $20^\circ \times 40^\circ$  displayed  
272 randomly to either the left or right eye at two distinct positions next to each other in the central  
273 visual field. Within the patch a sinusoidal grating was displayed in eight directions for 7 s  
274 (grating direction was changed every 0.6 s) with a temporal frequency of 2 cycles/s and a  
275 spatial frequency of 0.04 cycles/degree. Individual trials were separated by 8 s of a full-field  
276 gray stimulus (50% contrast). The entire stimulus sequence was applied at least 2 times for  
277 each eye and patch position during the surgery before virus injection and at least 3 times at  
278 the beginning of the first *in vivo* imaging session

279

#### 280 *In vivo 2-photon imaging*

281 L2/3 PyrCs co-expressing GCaMP6m and the bright structural marker mRuby2 (mRuby2-  
282 CSG-P2A-GCaMP6m) were imaged *in vivo* using a tunable pulsed femtosecond Ti:Sapphire  
283 laser (Newport Spectra-Physics) and a customized commercial 2-photon microscope (16x 0.8  
284 NA water immersion objective; B-Scope I, Thorlabs). The laser was tuned to  $\lambda=940$  nm in



285 order to simultaneously excite GCaMP6m and mRuby2. After rejecting excitation laser light  
286 (FF01-720/25, Semrock), the emitted photons passed through a primary beam splitter (FF560  
287 dichroic, Semrock) and band pass filters (FF02-525/50 and FF01-607/70, Semrock) onto  
288 GaAsP photomultiplier tubes (H7422P-40, Hamamtsu) to separate green and red  
289 fluorescence.

290 Multiple imaging planes were acquired by rapidly moving the objective in the z-axis using a  
291 high-load piezo z-scanner (P-726, Physik Instrumente). The imaged volume for functional  
292 cellular imaging was  $250 \times 250 \times 100 \mu\text{m}^3$  with 4 inclined image planes, each separated by 25  
293  $\mu\text{m}$  in depth. Imaging frames of  $512 \times 512$  pixels (pixel size  $0.5 \mu\text{m}$ ) were acquired at 30 Hz  
294 by bidirectional scanning of an 8 kHz resonant scanner while beam turnarounds were blanked  
295 with an electro-optic modulator (Pockels cell). Imaging was performed between 130-400  $\mu\text{m}$   
296 below the pial surface. Excitation power was scaled exponentially (exponential length constant  
297  $\sim 150 \mu\text{m}$ ) with depth to compensate for light scattering in tissue with increasing imaging depth.  
298 The average power for imaging was  $<50 \text{ mW}$ , measured after the objective. The optical axis  
299 was adjusted orthogonal to the cranial window. ScanImage 4.2 (Pologruto et al., 2003) and  
300 custom written hardware drivers were used to control the microscope.

301 After functional characterization of L2/3 PyrCs, at least two high-resolution structural image  
302 stacks with different field of view sizes were acquired at  $\lambda=940 \text{ nm}/1040 \text{ nm}$ . 1) 450 sections  
303 ( $512 \times 512$  pixels) with a pixel size of  $0.5 \mu\text{m}$  collected in z-steps of  $1.4 \mu\text{m}$  (imaged volume of  
304  $256 \times 256 \times 630 \mu\text{m}^3$ ); 2) 350 sections ( $512 \times 512$  pixels) with a pixel size of  $1.9 \mu\text{m}$  collected  
305 in z-steps of  $2 \mu\text{m}$  (imaged volume of  $972 \times 972 \times 700 \mu\text{m}^3$ ).

306 Experiments were performed under light anesthesia. Data acquisition started  $\sim 45 \text{ min}$  after an  
307 i.p. injection of Fentanyl ( $0.035 \text{ mg kg}^{-1}$ ), Midazolam ( $3.5 \text{ mg kg}^{-1}$ ) and Medetomidine ( $0.35 \text{ mg}$   
308  $\text{kg}^{-1}$ ). Additional doses of anesthetics (25% of induction level) were subcutaneously injected  
309 every 45-60 mins to maintain the level of anesthesia. Ophthalmic ointment was applied to  
310 protect the eyes. Mice were fixed under the microscope by screwing the metal head-plate to  
311 two posts. Stable thermal homeostasis was maintained by using a heated blanket throughout  
312 the imaging session. Eye and pupil positions were recorded with two cameras (DMK  
313 22BUC03, The Imaging Source Europe GmbH) throughout *in vivo* imaging.

314

### 315 *Visual stimulation*

316 Visual stimuli were generated using the MATLAB Psychophysics Toolbox extension and  
317 displayed on a gamma-corrected LCD monitor ((Brainard, 1997), <http://psychtoolbox.org>). The  
318 screen measured  $24.9 \times 44.3 \text{ cm}$ , had a refresh rate of 60 Hz and was positioned in portrait  
319 orientation  $13 \text{ cm}$  in front of the eyes of the mouse, providing a viewing angle of  $\sim 45 \text{ deg}$  on  
320 each side from the center of the monitor. The monitor was adjusted in position (horizontal  
321 rotation and vertical tilt) for each mouse to align with the horizontal visual axis and to cover

322 the binocular visual field ( $-15^\circ$  to  $35^\circ$  elevation and  $-25^\circ$  to  $25^\circ$  azimuth relative to midline). The  
323 presented stimulus area was chosen to subtend binocular visual space and the rest of the  
324 screen was uniformly grey (50% contrast). An OpenGL shader was applied to all presented  
325 stimuli to correct for the increasing eccentricity on a flat screen relative to the spherical mouse  
326 visual space (Marshel et al., 2011). Randomly alternating monocular stimulation of the eyes  
327 was achieved by motorized eye shutters and custom MATLAB scripts.

328 For all visual stimuli presented, the backlight of the LED screen was synchronized to the  
329 resonant scanner, switching on only during the bidirectional scan turnaround periods when  
330 imaging data were not recorded (Leinweber et al., 2014). The mean luminance with 16 kHz  
331 pulsed backlight was  $0.01 \text{ cd/m}^2$  for black and  $4.1 \text{ cd/m}^2$  for white.

332 To measure visually evoked responses, the right or left eye was visually stimulated in random  
333 order using drifting black and white square wave gratings of eight directions with a temporal  
334 frequency of 3 cycles/s and a spatial frequency of 0.04 cycles/degree. Stimulation duration for  
335 moving gratings was 5 s interleaved by 6 s of a full-field grey screen. Trials were repeated 4  
336 times per eye and direction.

337

### 338 *Morphological reconstruction and analysis*

339 The reconstruction of dendritic cell morphology was performed manually using the Simple  
340 Neurite Tracer of ImageJ (Schindelin et al., 2012). Reconstructions were quantitatively  
341 analyzed in MATLAB and with the open-source TREES toolbox (Cuntz et al., 2011). The radial  
342 distance was measured as the Euclidean distance from the soma to each segment terminal.  
343 The total length was measured as the sum of all internode sections' lengths of the neurite. For  
344 Sholl analysis, the number of intersections between dendrites and concentric spheres  
345 centered on the soma was determined at increasing distances from the soma ( $20 \mu\text{m}$   
346 increments). The distance to peak branching was measured as the distance of maximal  
347 dendritic branching from the soma. The width/height ratio was measured as the overall  
348 maximum horizontal extent divided by the overall maximum vertical extent.

### 349 *Intrinsic properties extraction*

350 Electrophysiological parameters were extracted using the PANDORA Toolbox (Günay et al.,  
351 2009) and custom-written software in MATLAB. The active, single spike parameters were  
352 measured using the first spike evoked by current injection (at Rheobase). The parameters  
353 were measured/calculated and defined in the following way:

354 **Passive:**

- 355 1. Resting membrane potential ( $V_{\text{rest}}$ ): The membrane potential measured after break-in.
- 356 2. Membrane time constant,  $\tau_m$  (ms): This was estimated using an exponential fit to the  
357 recovery of the voltage response following hyperpolarizing step currents.

- 358 3. Input resistance,  $R_{IN}$  ( $M\Omega$ ): Estimated by the linear fit of the  $I-\Delta V$  curve (using  
359 subthreshold de- and hyperpolarizing pulses (-30:10:30 pA).
- 360 4. Sag in percentage (Sag ratio):  $100 \left( \frac{V_{ss} - V_{min}}{V_{rest} - V_{min}} \right)$ , where  $V_{ss}$  is the voltage at steady-state,  
361  $V_{rest}$  the resting membrane potential and  $V_{min}$  the minimum voltage reached during  
362 hyperpolarizing current injections of -300 pA.
- 363 5. Rheobase (pA): The minimum current amplitude of infinite duration required for action  
364 potential generation. Measured by depolarizing current pulses (10:10:300 pA).

365 **Active:**

- 366 1. Minimal membrane voltage during Afterhyperpolarization ( $APV_{min}$ ): This was estimated  
367 as the membrane potential minimum during the period of the AHP.
- 368 2. Peak membrane voltage of action potential ( $APV_{peak}$ ).
- 369 3. Threshold voltage at action potential initiation ( $APV_{thresh}$ ).
- 370 4. The maximal slope of the action potential ( $APV_{slope}$ ): The maximal rate of rise of  
371 membrane voltage during the spike rise phase.
- 372 5. Membrane voltage at action potential half-height ( $APV_{half}$ ).
- 373 6. Amplitude of the action potential ( $APV_{amp}$ ): Amplitude calculated as difference between  
374 the voltage at  $APV_{thresh}$  and  $APV_{peak}$ .
- 375 7. Maximal amplitude of AHP (AHP): It was measured as the difference between the  
376  $APV_{thresh}$  and  $APV_{min}$ .
- 377 8. Spike frequency,  $APfreq_{max}$  (Hz): The maximum action potential number evoked by  
378 step-current injections divided by the pulse duration. Measured at the depolarizing  
379 current pulse, that evoked maximum action potential number (10-400 pA).

380

381 ***Input map analysis***

382 The spatial resolution of LSPS by UV glutamate uncaging was calculated based on the size  
383 of the excitation profiles as the mean weighted distance from the soma ( $d_{soma}$ ) of AP generating  
384 stimulation sites using the following equation (Shepherd and Svoboda, 2005):

385

386

$$R = \frac{\sum APs \times d_{soma}}{\sum APs}$$

387

388 LSPS by UV glutamate uncaging induces two types of responses (Shepherd and Svoboda,  
389 2005): 1) Direct glutamate uncaging responses originating from direct activation of the  
390 glutamate receptors on the recorded neuron by uncaged glutamate. 2) Synaptic responses  
391 originating from the activation of synaptic glutamate receptors on the recorded neuron by  
392 glutamate release from presynaptic neurons stimulated by LSPS. Responses to the LSPS  
393 stimulation protocol (both for EPSCs and IPSCs) were quantified in the 150 ms window  
394 following the uncaging light-pulse, since this is the time window where evoked activity is  
395 observed in most cases. Considering the diversity of responses encountered in these  
396 experiments, a heuristic analysis scheme was devised to address the main observed cases:  
397 1) Traces without response were excluded by only considering those responses with a  
398 deflection higher than 2 S.D. over the baseline at any point. Additionally, traces that only had  
399 a significant response in one repetition were also excluded.  
400 2) Then, purely synaptic responses, i.e. those that correspond only to activation of the  
401 presynaptic neuron via uncaged glutamate were selected by taking the traces that passed the  
402 2 S.D. threshold only after a 7 ms window from the offset of stimulation.  
403 3) For responses that did not pass the previous criterion, inspection by eye indicated that  
404 several of them presented all the identifiable features of purely synaptic responses but seemed  
405 to cross the threshold slightly earlier than 7 ms. An additional set of experiments performed  
406 on a subset of cells, where maps were measured before and after application of TTX (and  
407 hence before and after only direct responses were present) were performed to characterize  
408 these intermediate cases (~5% of the total number of traces). These experiments showed that  
409 by using a secondary window of 3.5 ms, the average contribution of a direct response to the  
410 overall response in these intermediate traces is ~20 % (data not shown). Therefore, this  
411 secondary window was used to include a second batch of traces into the synaptic response  
412 pool.  
413 4) Finally, those traces that did not pass the secondary window were then blanked, and a 4-  
414 dimensional interpolation method (MATLAB function "griddatan") was used to infer their  
415 temporal profiles based on their 8 neighboring pixel activities in space and time. In the TTX  
416 experiments (data not shown) every position with a direct response was observed to have a  
417 synaptic component, but the summation of this synaptic component and the overlapping direct  
418 component is non-linear. Therefore, this interpolation method was used to extract the synaptic  
419 component partially masked in the raw traces by the direct response. The approach relies on  
420 the observation that the synaptic responses of neighboring positions are similar across time,  
421 therefore indicating that information on the synaptic responses masked by direct responses is  
422 contained in the responses surrounding them. These interpolated responses were then  
423 incorporated into the maps as synaptic responses. For excitatory input maps, the first two  
424 stimulation rows were excluded since L1 contains no excitatory neurons (Jiang et al., 2015)

425 and excitatory input from L1 originated from cells in L2/3-L5 having apical tuft dendrites in L1,  
426 which fired action potentials in exceptional cases when their tufts were stimulated in L1  
427 (Dantzker and Callaway, 2000).

428 For Principal Component Analysis (PCA) on input maps, the input maps were aligned based  
429 on the soma position of each cell. This involved shifting the maps vertically an integer number  
430 of stimulus rows until all the somata were in the same row. Subsequently, all maps were  
431 normalized and used as features for PCA. The combined excitation-inhibition PCA  
432 decomposition was then calculated. For this, the feature vectors from excitation and inhibition  
433 for each map were concatenated, yielding a 512 element feature vector that was then used  
434 for the decomposition. The first three principal component weights for each input map were  
435 extracted (carrying roughly 60% of the variance in the dataset).

436 The data includes input maps of 70 L2/3 PyrCs from a previously obtained data set (Weiler et  
437 al., 2020).

438

439

#### 440 *UMAP embedding*

441 Uniform Manifold Approximation and Projection was utilized to visualize the distribution of  
442 different properties across the data on a cell by cell basis. The computational details of UMAP  
443 are described elsewhere (McInnes et al., 2018). Briefly, UMAP embeds data points from a  
444 high dimensional space into a 2D space preserving their high dimensional distances in a  
445 neighborhood. This permits effective visualization of the connections between data points. A  
446 UMAP implementation in MATLAB developed by Meehan, Meehan and Moore  
447 (<https://www.mathworks.com/matlabcentral/fileexchange/71902>) was utilized. The respective  
448 principal components for morphology, electrophysiology, input maps and *in vivo* functional  
449 responses were used as the embedding parameters. The number of neighbors was 15 and  
450 the minimum distance was 0.1 (default parameters). The embedded points were color-coded  
451 depending on the normalized pial-depth.

452

#### 453 *In vivo imaging analysis*

454 Custom-written MATLAB code was used for image and data analysis.

455 For IOS imaging analysis, the acquired images were high-pass filtered and clipped (1.5%) to  
456 calculate blank-corrected image averages for each condition. Additionally, a threshold criterion  
457 (image background mean + 4 x standard deviation) was set to determine the responsive region  
458 within the averaged image. The mean background value of the non-responsive region was  
459 subtracted from each pixel and all pixel values within the responsive area were summed to  
460 obtain an integrated measure of response strength.

461 In the case of 2-photon calcium imaging, the use of GCaMP6m in combination with mRuby2  
462 gave the possibility to perform ratiometric imaging (Rose et al., 2016). Image sequences were  
463 full-frame corrected for tangential drift and small movements caused by heart beat and  
464 breathing. An average of 160 image frames acquired without laser excitation was subtracted  
465 from all frames of the individual recording to correct for PMT dark current as well as residual  
466 light from the stimulus screen. Cell body detection was based on the average morphological  
467 image derived from the structural channel (mRuby2) for each recording session. ROIs (region  
468 of interest) were drawn manually and annotated. The fluorescence time course was calculated  
469 by averaging all pixel values within the ROI on both background-corrected channels, followed  
470 by low-pass filtering (0.8 Hz cut-off) and by subtraction of the time-variable component of the  
471 neuropil signal (pixel average within a band of 15  $\mu\text{m}$  width, 2  $\mu\text{m}$  away from the ROI  
472 circumference, excluding overlap with other selected cells and neuropil bands, neuropil factor  
473  $r$  of 0.7 (Kerlin et al., 2010)). The green and red fluorescence signal were estimated as:

$$474 \quad F_{green_{cell}}(t) = F_{green_{cell\_measured}}(t) - r \times F_{green_{neuropil}}(t) + r$$
$$475 \quad \times \text{median}(F_{green_{neuropil}}(t))$$

$$476 \quad F_{red_{cell}}(t) = F_{red_{cell\_measured}}(t) - r \times F_{red_{neuropil}}(t) + r \times \text{median}(F_{red_{neuropil}}(t))$$

477  
478  
479  
480  
481 The ratio  $R(t)$  was then calculated as:

$$482 \quad R(t) = \frac{F_{green_{cell}}(t)}{F_{red_{cell}}(t)}$$

483  
484  
485 Residual trends were removed by subtracting the 8<sup>th</sup> percentile of a moving 14 s temporal  
486 window from  $R(t)$ .  $\Delta R/R_0$  was calculated as:

$$487 \quad \Delta R/R_0 = \frac{R - R_0}{R_0}$$

488  
489  
490 where  $R_0$  is the median of the mean baseline fluorescence ratios over a 1 s period preceding  
491 visual stimulation in each trial. Visual responses were quantified as mean fluorescence ratio  
492 change over the full stimulus interval both in individual trials and the trial-averaged mean  
493 fluorescence ratio.

494 Visual responsiveness was tested with a one-way ANOVA performed over all trials with and  
495 without visual stimulus. Neurons with  $p$ -values  $< 0.05$  were identified as visually responsive.

496 OD was determined by the OD index (ODI):

497

$$ODI = \frac{\frac{\Delta R}{R_0} \text{contra}_{pref\_dir} - \frac{\Delta R}{R_0} \text{ipsi}_{pref\_dir}}{\frac{\Delta R}{R_0} \text{contra}_{pref\_dir} + \frac{\Delta R}{R_0} \text{ipsi}_{pref\_dir}}$$

498

499  
500 Where an ODI value of 1 or -1 indicates exclusive contra- and ipsilateral dominance,  
501 respectively.

502 Global orientation selectivity index (gOSI) was computed as 1 - circular Variance (circ. Var.):

503

$$gOSI = 1 - \text{circ. var.} = \left| \frac{\sum R(\theta_k) e^{2i\theta_k}}{\sum R(\theta_k)} \right|$$

504

505

506 and global direction selectivity index (gDSI) was computed as:

507

$$gDSI = 1 - \text{dir. circ. var.} = \left| \frac{\sum R(\theta_k) e^{i\theta_k}}{\sum R(\theta_k)} \right|$$

508

509

510

511  $R(\theta_k)$  is here the mean response to the direction angle ( $\theta_k$ ) (Mazurek). Perfect orientation and  
512 direction selectivity is indicated with gOSI and gDSI of 1, whereas a gOSI and gDSI value of  
513 0 indicates no orientation or direction selectivity, respectively. The preferred orientation and  
514 direction as well as tuning width were computed by fitting a double-Gaussian tuning curve to  
515 the responses as previously described (Carandini and Ferster, 2000). The tuning width was  
516 extracted as the sigma of the fitted curve. The goodness-of-fit was assessed by calculating  $R^2$   
517 and only cells with  $R^2 > 0.3$  were included in the analysis.

518 For binocular cells, the preferred orientation was defined as the one from the dominant eye,  
519 as determined by the sign of the ODI.

520

521

## 522 **Statistics**

523 Data are reported as mean  $\pm$  standard error of the mean (SEM). Correlation coefficients were  
524 calculated as Pearson's correlation coefficient. Before comparison of data, individual data sets  
525 were checked for normality using the Kolmogorov-Smirnov Goodness-of-Fit test. None of the  
526 data sets considered in this study was found to be normally distributed. Therefore, paired or  
527 unpaired nonparametric statistics (Wilcoxon rank sum test) were used for comparison. Two-  
528 tailed tests were used unless otherwise stated. Correction of multiple comparison was  
529 performed by the Benjamini & Hochberg procedure (Benjamini and Hochberg, 1995).  
530 Asterisks indicate significance values as follows: \* $p < 0.05$ , \*\*  $p < 0.01$ , \*\*\*  $p < 0.001$ .

531

## 532 **Results**

### 533 **Morphological properties of L2/3 pyramidal cells vary gradually with pial depth**

534 The dendritic architecture of a cell constrains the sampling of potential synaptic inputs and  
535 thereby controls information integration. To study the variations of dendritic architecture  
536 across L2/3, 189 Alexa 594-filled L2/3 PyrCs in mouse bV1 were manually reconstructed (36  
537 of these were included from a previously collected data set (Weiler et al., 2020)).

538 Three representative examples of dendritic morphologies across L2/3 are shown in Fig. 1A.  
539 The data set covers the whole cortical depth of L2/3, with cells reconstructed in upper as well  
540 as lower parts of the layer (Fig. 1A, B). Given that apical and basal dendrites are targeted by  
541 different types of inputs (feedback vs. feedforward, (Petreanu et al., 2009)), we separately  
542 characterized the apical and basal dendritic architecture by Sholl analysis (Fig. 1C). In  
543 addition, we extracted sets of commonly used morphological parameters for the apical and  
544 basal dendrites (Table 1). Overall, the parameters are either related to dendritic length (e.g.,  
545 total length, maximal horizontal extent, distance to peak Sholl crossing, see Methods) or to  
546 dendritic complexity (e.g., number of branch points, peak number of Sholl crossings, see  
547 Methods).

548  
549 To compare depth-dependent changes, we sorted the apical and basal dendritic tree  
550 parameters according to their correlation with the cell's depth within L2/3 in descending order  
551 (Fig. 1D, E, Pearson's correlation coefficient). This showed that most (8 out of 11) apical tree  
552 parameters were significantly correlated with pial depth. In contrast, only 1 out of 12 basal tree  
553 parameters was significantly correlated with pial depth. Most prominently, the apical trees of  
554 neurons located in the more superficial part of L2/3 had the largest horizontal extent (width).  
555 Since the apical dendrites of all cells reached the pial surface, we also observed a strong  
556 relation between vertical extent (height) and pial depth (Fig. 1D, F). To eliminate potential  
557 redundancies in the information carried by these parameters, we performed principal  
558 component analysis separately for the apical and basal dendrites. For the apical dendrite, the  
559 first three principal components, explaining approximately 75% of variance, were significantly  
560 correlated with pial depth (PC1:  $r=0.15$ ,  $p<0.05$ ; PC2:  $r=0.8$ ,  $p<0.001$ ; PC3:  $r=-0.29$ ,  $p<0.001$ ,  
561 Pearson's correlation coefficient) with PC2 showing the strongest correlation (Fig 1G, see  
562 Table 1 for principal components eigenvalues). For the basal dendrite, principal component 1  
563 and 2, but not principal component 3 were uncorrelated with pial depth (PC1:  $r=-0.11$ ,  $p=0.14$ ;  
564 PC2:  $r=0.12$ ,  $p=0.1$ ; PC3:  $r=-0.32$ ,  $p<0.001$ , Pearson's correlation coefficient).

565  
566 Taken together, the apical dendritic architecture of L2/3 PyrCs systematically varies with pial  
567 depth, whereas the basal tree morphology does not.



568

569 **Passive but not active electrical properties of L2/3 pyramidal cells vary gradually with**  
570 **pial depth**

571 Besides the dendritic architecture, the intrinsic electrical characteristics influence the  
572 functional properties of neurons. To determine the electrophysiological properties of PyrCs  
573 across the depth of L2/3, we analyzed the responses of 137 L2/3 PyrCs to hyper- and  
574 depolarizing somatic current injections (Fig. 2A, B). We measured five passive and eight active  
575 intrinsic properties (Table 2). Again, we sorted the passive and active properties according to  
576 their correlation with the cell's depth within L2/3 in descending order (Fig. 2C, D). While four  
577 out of five passive intrinsic properties significantly correlated with cortical depth, none of the  
578 eight active properties did. Specifically, more superficial L2/3 PyrCs had a larger input  
579 resistance ( $R_{IN}$ ) and at the same time slower membrane time constants ( $\tau_m$ ) compared to  
580 PyrCs in the lower part of L2/3 (Fig. 2E). Performing PCA on the passive intrinsic properties  
581 also showed a correlation between pial depth and the first two principal components,  
582 explaining approximately 75% of variance (Fig. 2F, PC1 vs. pial depth:  $r=-0.32$ ,  $p<0.001$ , PC2  
583 vs. pial depth:  $r=-0.18$ ,  $p<0.05$ , Pearson's correlation coefficient, see Table 2 for principal  
584 components eigenvalues).

585

586 In a subset of L2/3 PyrCs, we obtained both the dendritic morphology as well as the intrinsic  
587 properties. In line with the above-described depth-dependent changes of apical tree and  
588 passive properties, we observed that some features covaried in this subset of cells. We found  
589 that the total length as well as the complexity of the apical tree was negatively correlated with  
590  $\tau_m$ , confirming that the dendritic structure influences the passive properties, as has been  
591 previously demonstrated ((Bekkers and Häusser, 2007) but see (Deitcher et al., 2017)).

592

593 In summary, several passive but no active electrical properties of L2/3 PyrCs systematically  
594 vary with pial depth.

595

596

597 **Spatial connectivity of L2/3 pyramidal cells varies with pial depth**

598 Given the functional response heterogeneity of L2/3 PyrCs in V1 (Niell and Stryker, 2008;  
599 Andermann et al., 2011; Marshel et al., 2011), and the aforementioned changes in morpho-  
600 electric properties with pial depth, we wondered whether the excitatory and inhibitory  
601 microcircuits, in which L2/3 PyrCs are embedded, also systematically vary based on the cell's  
602 position in L2/3. We therefore mapped the monosynaptic intra- and interlaminar excitatory and  
603 inhibitory inputs to 147 L2/3 PyrCs via UV-glutamate uncaging in acute coronal brain slices of  
604 bV1 (Callaway and Katz, 1993; Dantzker and Callaway, 2000). We recorded excitatory and

605 inhibitory input in the same cells, and thus were able to assess their relationship on a cell-by-  
606 cell basis across the depth of L2/3.

607

608 We observed that input maps varied in the laminar and horizontal distribution of synaptic input  
609 sources depending on the postsynaptic cell location within L2/3 (Fig. 3A, B). For quantification,  
610 we peak-normalized the input maps, computed the input fractions per row and column of the  
611 stimulus grid, and sorted these based to their correlation with the cell's depth within L2/3 in  
612 descending order (Fig. 3C, D). As reported for auditory cortex (Meng et al., 2017), we  
613 observed that the fraction of excitatory and inhibitory input from L4 was positively correlated  
614 with the distance between the cell and the pia (Fig. 3C, E,  $r=0.41$  and  $r=0.3$ ,  $p<0.001$ ,  
615 Pearson's correlation coefficient) with more superficial cells receiving less fractional excitation  
616 and inhibition from L4 in comparison to deeper cells. Excitatory input from L2/3 displayed the  
617 opposite correlation (Fig. 3C,  $r=-0.3$ ,  $p<0.001$ , Pearson's correlation coefficient). Such  
618 correlation was not present for L5 inputs and inhibitory input from L2/3 (Fig. 3C, L5 EX,  $r=-$   
619  $0.04$ ,  $p=0.65$ ; L5 IN,  $r=0.17$ ,  $p=0.09$ ; L2/3 IN,  $r=0$ ,  $p=0.98$ , Pearson's correlation coefficient).  
620 Since most PyrCs received stronger excitation than inhibition from L4 regardless of their  
621 location, the difference between excitation and inhibition did not significantly correlate with pial  
622 depth (Fig. 3E, bottom).

623

624 Along the horizontal axis, the maximum spatial extent of the excitatory but not the inhibitory  
625 input distributions in L2/3 are negatively correlated with pial depth, with cells displaying a larger  
626 spatial extent in upper compared to lower L2/3 (Fig. 3F). This suggests that the extent of  
627 cortical space across which L2/3 PyrCs integrate within-layer information increases gradually  
628 with decreasing pial depth.

629

630 To account for potential redundancies in the information carried by the measured parameters,  
631 PCA was performed on the entire set of 16x16 pixel input maps, at the same time for excitation  
632 and inhibition (Fig. 3G, see Methods). Prior to PCA, the input maps were horizontally and  
633 vertically aligned based on the soma position of each cell. The input maps corresponding to  
634 the first three principal components ("eigenmaps", Fig. 3G) explained ~60% of the variance  
635 for both excitatory and inhibitory inputs. Importantly, the first and the third principal component  
636 significantly correlated with the pial depth, even though we accounted for cell location  
637 information by alignment before performing PCA (Fig. 3H, PC1 vs. pial depth,  $r=0.44$ ,  $p<0.001$ ;  
638 PC3 vs. pial depth,  $r=-0.23$ ,  $p<0.01$ , Pearson's correlation coefficient). This indicates that the  
639 input pattern itself contains information about the cell location. The principal components were  
640 strongly related to the vertical and horizontal spatial features of the input maps described  
641 above. For example, while the PC1 weight was significantly correlated with the difference

642 between the excitatory and inhibitory input fraction in L2/3 ( $r=0.35$ ,  $p<0.001$ , Pearson's  
643 correlation coefficient), the PC3 weight was significantly correlated with the difference between  
644 the excitatory and inhibitory input fraction in L4 ( $r=-0.35$ ,  $p<0.001$ , Pearson's correlation  
645 coefficient).

646

647 Finally, in a subset of 97 L2/3 PyrCs, we reconstructed the dendritic morphology and mapped  
648 the functional input in the same cells, enabling us to directly compare the covariations of these  
649 two qualities. We observed numerous correlations between the functional input features and  
650 the apical dendritic parameters given their respective pial depth dependencies. We therefore  
651 focused on the relation between basal tree architecture – which does not covary with depth  
652 (Fig. 1) – and spatial input arrangement since most local input terminates on the basal tree  
653 (Shepherd et al., 2005; Petreanu et al., 2009). We found that the ratio between the width and  
654 height of the basal tree positively correlated with the horizontal extent of the functional input  
655 in L2/3 (Fig. 3I,  $r=0.34$ ,  $p<0.01$ , Pearson's correlation coefficient). Additionally, these  
656 parameters were the only ones that significantly correlated with pial depth when considering  
657 the basal tree and the horizontal presynaptic input (see also section above). This suggests  
658 that, as pial depth decreases, L2/3 PyrCs gradually sample more widely distributed functional  
659 input across cortical space. This larger input sampling is potentially achieved via horizontally  
660 extended basal trees.

661

662 Taken together, these results show that L2/3 PyrCs display a gradual change in the spatial  
663 organization of their input distributions with pial depth.

664

### 665 ***In vivo* L2/3 pyramidal cells show depth-dependent variations in stimulus response** 666 **amplitude and ocular dominance, but not in tuning heterogeneity**

667 How do the observed gradual changes in the different properties relate to visual responses of  
668 L2/3 PyrCs in bV1 *in vivo*? Previous recordings in L2/3 of mouse monocular V1 showed a  
669 gradual change in overall responsiveness and orientation as well as direction selectivity with  
670 pial depth (O'Herron et al., 2020). However, the depth-dependent distribution of other features  
671 like eye-specific responsiveness have remained unaddressed so far.

672

673 To better understand eye-specific responsiveness, feature selectivity as well as the change of  
674 binocularity across the depth of L2/3 in bV1, we performed *in vivo* 2-photon calcium imaging  
675 (Fig. 4A). For this, we expressed GCaMP6m in L2/3 PyrCs (Weiler et al., 2018), and imaged  
676 across depths ranging from 150-400  $\mu\text{m}$  (Fig. 4A, B). We extracted the following visually  
677 evoked response features for each cell: Preferred orientation and direction, global orientation

678 and direction selectivity index (gOSI, gDSI), tuning width, maximum response amplitude at the  
679 preferred stimulus direction and ocular dominance. To quantify ocular dominance, we  
680 computed the ocular dominance index (ODI; ranging from -1 to 1, with  $ODI < 0$  indicating  
681 ipsilateral and  $ODI > 0$  indicating contralateral dominance, Fig. 4B). To better compare depth-  
682 dependent changes, we sorted response features in descending order according to their  
683 correlation with the cell's depth within L2/3 (Fig. 4C).

684

685 Although some response features displayed correlations with pial depth, these were not  
686 significant (after correction for multiple comparison) and far smaller than the correlations  
687 observed with morphological, electrophysiological and input map parameters. However,  
688 performing PCA on the *in vivo* response features yielded a significant correlation between pial  
689 depth and the second principal component (Fig. 4C, D, PC2 vs. pial depth:  $r=0.1$ ,  $p < 0.01$ ,  
690 Pearson's correlation coefficient). Moreover, when dividing the data into two halves based on  
691 the relative pial depth, we observed further depth-dependent differences: PyrCs in the lower  
692 part of L2/3 showed significantly larger visually evoked responses compared to PyrCs in the  
693 upper part (Fig. 4E,  $p < 0.001$ , Wilcoxon rank-sum). Importantly, the overall proportion of  
694 visually responsive PyrCs was similar across the depth of L2/3 (upper half: 51%, lower half:  
695 47% of all structurally detected PyrCs, see Methods).

696

697 Given the previously described depth-dependent changes of orientation selectivity within  
698 monocular V1 (O'Herron et al., 2020), we next compared the global orientation selectivity  
699 index (gOSI) across the depth of L2/3 (see Methods). The gOSI was similar for PyrCs in the  
700 upper and lower part of L2/3, both when including all cells (Fig. 4F) or only cells with strong  
701 preferred response amplitude (third quartile, c.f. O'Herron, data not shown). Similarly, the  
702 preferred orientations of orientation selective cells ( $gOSI > 0.25$ ) were equally represented in  
703 the upper or lower part of L2/3, although there was a slightly higher fraction of PyrCs preferring  
704 more oblique oriented gratings (45 degrees) in the superficial part of the layer (Fig. 4G).

705

706 When comparing the ocular dominance of PyrCs across the depth of L2/3, we found a gradual  
707 change in eye dominance, with cells in the lower part displaying on average significantly larger  
708 contralateral eye dominance (Fig. 4H,  $p < 0.05$ , Wilcoxon rank-sum). This suggests that eye  
709 dominance is differentially distributed throughout L2/3.

710

711 In summary, in addition to gradual changes of morpho-electric properties and functional input  
712 connectivity, several *in vivo* stimulus response properties of L2/3 PyrCs in bV1 also change  
713 with pial depth.

714

715 **No evidence for distinct subtypes of L2/3 pyramidal cells based on structural and**  
716 **functional properties**

717 We describe depth-dependent changes in several properties that have been used to  
718 categorize PyrCs into subtypes in the past (Vélez-Fort et al., 2014; Kim et al., 2015; Gouwens  
719 et al., 2019). Consequently, we next wondered whether these variations across L2/3 justify  
720 the classification of PyrCs into discrete subtypes.

721

722 For evaluating the presence of clusters in the different data sets, we used the extracted  
723 principal components followed by a Dip test (Hartigan, 1985; Adolfsson et al., 2019) to assess  
724 multimodality in the principal component weights (see Methods). We found that the weights of  
725 the first three principal components for morphology, intrinsic properties, spatial distribution of  
726 functional input as well as visually evoked response features did not show significant  
727 multimodality, arguing against the presence of distinct clusters (Fig. 5A, Hartigan's Dip test).  
728 Moreover, when plotting first and second PC weights against each other, no clear separation  
729 was observed for any of the properties (Fig. 5B). This holds also for basal dendritic tree  
730 morphology and active electrophysiological properties that do not show correlations with pial  
731 depth (data not shown). This suggests that even though L2/3 PyrCs display quantitative  
732 differences in their various properties, these differences do not justify the separation of L2/3  
733 PyrCs into discrete subpopulations of cells.

734

735 Alternatively, rather than forming separate clusters, L2/3 PyrCs appear to form a single, but  
736 inhomogeneous set of neurons whose properties follow a depth-dependent continuum. To  
737 illustrate this better, we displayed individual cells in two-dimensional UMAP (Uniform Manifold  
738 Approximation and Projection) plots for the different data sets (Fig. 5C), via an embedding  
739 based on the first three principal components in each case. The data points aggregated  
740 together in single quasi-continuous clouds, rather than separating into well-delineated  
741 clusters. However, by color-coding cells according to their pial depth in the UMAP plots,  
742 gradients become visible that show how morphology, electrophysiological properties, and  
743 input maps systematically vary with pial depth.

744

745 In conclusion, morpho-electric features, local excitatory and inhibitory inputs as well as visually  
746 evoked response properties of L2/3 PyrCs continuously vary across the depth of visual cortex  
747 but this variability does not indicate clusters.

748

749

## 750 **Discussion**

751 Our study shows that PyrCs vary in multiple properties across the vertical extent of L2/3: 1)  
752 The apical dendritic tree progressively spans less horizontal but more vertical space with  
753 increasing depth. 2) Passive but not active intrinsic properties gradually change with pial  
754 depth. 3) PyrCs in the lower part of L2/3 receive stronger ascending input from L4 compared  
755 to PyrCs in the upper part, whereas the horizontal extent of excitatory input is larger for upper  
756 vs. lower L2/3 PyrCs. 4) Visual response properties such as ocular dominance and response  
757 amplitude show depth-dependent changes. All these changes take place continuously and,  
758 thereby, do not justify categorization of L2/3 PyrCs into discrete subtypes.

759

### 760 **Gradually changing morpho-electric properties of L2/3 pyramidal cells**

761 When considering the architecture of their apical tree, PyrCs displayed a morphological  
762 continuum across L2/3. PyrCs in lower L2/3 had a long apical dendrite with a tuft, whereas  
763 PyrCs in upper L2/3 showed shorter but wider apical trees that branched profusely in L1, as  
764 previously described in monocular V1 (Larkman and Mason, 1990; Gouwens et al., 2019) and  
765 other sensory cortical areas (Staiger et al., 2015). Interestingly, the total length as well as the  
766 number of branch points of the apical tree did not significantly vary between PyrCs located in  
767 the upper or lower part of L2/3, similar to other sensory cortical areas (Staiger et al., 2015).  
768 Hence, PyrCs throughout L2/3 could in principle sample a comparable number of synaptic  
769 inputs, although they display variations in their horizontal as well as vertical extent.

770

771 In contrast to the apical tree, the basal dendritic trees did not show any strong relation with  
772 pial depth in the present study. This is in line with previous reports showing that basal dendritic  
773 trees do not significantly vary across sensory cortical layers (Bielza et al., 2014; Kanari et al.,  
774 2019).

775

776 The morphological architecture of apical dendrites has been shown to be associated with  
777 specific active electrophysiological properties, such as firing patterns (Mainen and Sejnowski,  
778 1996; Deitcher et al., 2017), or passive properties, such as input resistance (Tyler et al., 2015).  
779 Numerous studies have reported differences in passive electrophysiological properties of  
780 superficial vs. deep L2/3 PyrCs (Zaitsev et al., 2012; Staiger et al., 2015; Van Aerde and  
781 Feldmeyer, 2015). The most prominent and consistent difference is that more superficial L2/3  
782 PyrCs show a higher input resistance as well as a slower membrane time constant compared  
783 to lower L2/3 PyrCs ((Staiger et al., 2015; Van Aerde and Feldmeyer, 2015; Luo et al., 2017),  
784 but see (Deitcher et al., 2017)). Similarly, we found a significant negative correlation of input  
785 resistance and membrane time constant with cortical depth in L2/3 PyrCs of mouse bV1.

786 Additionally, analyzing correlations between morphology and electrophysiology directly in the  
787 same cells, we found that total dendritic length and dendritic complexity are negatively  
788 correlated with the membrane time constant. The input resistance variance resulted in  
789 differences in neuron excitability (as measured via Rheobase in our study). Therefore, cells in  
790 the upper regions of L2/3 could in principle be more strongly activated with the same input  
791 strength compared to lower L2/3 cells. Indeed, L2 PyrCs in monkey V1 show higher levels of  
792 ongoing activity compared to L3 PyrCs (Gur and Snodderly, 2008).

793

794 Taken together, the gradual depth-dependent changes in morpho-electric properties of L2/3  
795 PyrCs shape the input and output relationship of these neurons, and ultimately influence the  
796 functional information processing across this layer.

797

### 798 **Depth-dependent laminar circuits and functional response properties of L2/3 pyramidal** 799 **cells**

800 Following the depth-dependent morpho-electric variations of L2/3 PyrCs, we found that the  
801 spatial organization of excitatory and inhibitory intracortical inputs to L2/3 gradually changes  
802 with cortical depth. A depth-dependent change of intracortical connectivity in L2/3 was also  
803 observed in primary somatosensory as well as primary auditory cortex using a similar circuit  
804 mapping approach (Staiger et al., 2015; Meng et al., 2017). These studies found that L2/3  
805 PyrCs close to the L4 border receive more ascending excitatory L4 input compared to L2/3  
806 PyrCs close to the L1 border, consistent with our results. Moreover, superficial L2/3 PyrCs  
807 received stronger intralaminar excitatory input compared to PyrCs closer to L4. Additionally,  
808 the excitatory horizontal extent of input coming from L2/3 was greater for cells in the upper  
809 part compared to cells in the lower part of L2/3, similar to the auditory cortex (Meng et al.,  
810 2017). However, in visual cortex we only observed this for inputs from within L2/3 and not from  
811 any other layer, in contrast to the auditory cortex.

812

813 The gradual change of input sources reported here suggests a functional continuum: L2/3  
814 PyrCs at the border to L4 predominately receive ascending feedforward input from L4 in  
815 conjunction with L4-mediated inhibition. The contribution of L4 input becomes progressively  
816 smaller in the superficial part, where ultimately intralaminar input dominates.

817

818 We found that the visually evoked response amplitude was larger in lower L2/3 PyrCs  
819 compared to more superficial L2/3 PyrCs, in line with a recent report in monocular V1  
820 (O'Herron et al., 2020). Strong L4 input paired with direct thalamic input (Morgenstern et al.,  
821 2016) to PyrCs in the lower part of L2/3, could lead to a stronger feedforward drive compared  
822 to upper L2/3 PyrCs, and thereby to the observed differences in response amplitudes. Other

823 *in vivo* tuning properties, such as orientation selectivity, were not significantly different across  
824 the depth of L2/3 in our study. This is at odds with previous studies in the monocular part of  
825 V1 (Gur and Snodderly, 2008; O'Herron et al., 2020), where the orientation selectivity was  
826 stronger in superficial L2/3. Future studies need to address whether this discrepancy is due to  
827 a difference in the depth-dependent distribution of this particular property in L2/3 between the  
828 monocular and binocular visual cortex, or whether the difference arises from different types of  
829 visual stimulation (full field visual stimulation vs. centered stimulation covering only binocular  
830 visual space; 1.5 Hz vs. 3 Hz temporal frequency).

831

832 With respect to ocular dominance, we find that L2/3 PyrCs closer to the border to L4 are on  
833 average dominated by the contralateral eye. This degree of contralateral dominance could in  
834 principle be inherited from L4 and/or direct thalamocortical projections (Morgenstern et al.,  
835 2016) but future research would be needed to address this contralateral bias.

836

837 Taken together, depending on where PyrCs and their corresponding input sources are located,  
838 the functional connectivity may directly influence specific functional response properties.

839

#### 840 **Absence of well-defined clusters of L2/3 pyramidal cells**

841 The observed depth-dependent variations in the different types of properties extracted in the  
842 present study did not support clustering due to their unimodal distributions which argues  
843 against subdivision of L2/3 PyrCs into discrete cell types. Likewise, also adding all parameters  
844 of the respective data sets that were uncorrelated with pial depth, lead to unimodal  
845 distributions and therefore did not support clustering. We thus did not find discrete subtypes  
846 of L2/3 PyrCs, which is different from the auditory cortex, where clustering was demonstrated  
847 on laminar input fractions, however, without prior testing for multimodality (Meng et al., 2017).  
848 Instead, we find a continuum of cellular properties across this layer (Scala et al., 2021). It  
849 would be of interest to apply the presented clusterability tests (Adolfsson et al., 2019) on  
850 different data sets for L2/3 PyrCs from other cortical regions, both in rodents as well as other  
851 species, to test the generalizability of a depth-dependent functional continuum within L2/3  
852 across cortical areas.

853

854 Why is it that there is a continuum-like parameter distribution of the different properties within  
855 L2/3? One reason could be the associative role of L2/3 in comparison to other layers. For  
856 example, an important output route of information from L2/3 PyrCs is via L5 and L6 PyrCs. In  
857 contrast to L2/3 PyrCs, L5 and L6 PyrCs separate into distinct subtypes based on the same  
858 parameters investigated in this study (Vélez-Fort et al., 2014; Kim et al., 2015; Tasic et al.,  
859 2016; Gouwens et al., 2019). The most crucial differences between the infragranular layers



860 and L2/3 are their output projections and their computational role. L5 and L6 contain  
861 intratelencephalic (IT) as well as extratelencephalic (ET) neurons, whereas L2/3 only contains  
862 IT neurons (Harris and Shepherd, 2015; Peng et al., 2021). Furthermore, PyrCs in L2/3 employ  
863 a different coding scheme compared to the infragranular layers. L2/3 PyrCs use sparse  
864 coding, whereas PyrCs in infragranular operate with a dense coding scheme (reviewed in  
865 (Harris and Mrsic-Flogel, 2013; Petersen and Crochet, 2013)). This indicates that  
866 computations in L5 and L6 are performed with projection-specific divisions, whereas within  
867 L2/3, such divisions in “hardware” are largely absent, with individual neurons being rather  
868 embedded in different IT (cortical-cortical) subcircuits, serving the associative role of this layer.

869

870 In summary, numerous neuronal properties of PyrCs gradually change with cortical depth in  
871 L2/3. This makes L2/3 a unique cortical layer, where information processing is based on  
872 pyramidal neurons with a continuous property space rather than discrete neuronal subtypes.

873

874 **Data availability statement**

875 The datasets generated and analyzed during the current study are available from the  
876 corresponding author on reasonable request.

877

878 **Code availability statement**

879 Custom code developed for analyzing the data during the current study is available on:  
880 [https://github.com/drguggiana/IVIV\\_pipeline](https://github.com/drguggiana/IVIV_pipeline)

881

882 **Author Contribution**

883 S.W. and V.S. conceived the project, with input from M.H., T.R., and T.B.. S.W. planned and  
884 performed all experiments. D.G.N. and S.W. wrote advanced analysis tools and D.G.N.,  
885 S.W., T.R. and V.S. analyzed the data. S.W. and V.S. implemented LSPS at the patch-  
886 clamp setups. T.R. designed and built the *in vivo* 2-photon setup and developed the viral  
887 construct. S.W., D.G.N, M.H., V.S., T.R. and T.B. wrote the manuscript. T.B. provided the  
888 research environment.

889

890 **Affiliations**

891 Max Planck Institute of Neurobiology, Martinsried, Germany: Simon Weiler, Drago Guggiana  
892 Nilo, Tobias Bonhoeffer, Mark Hübener, Tobias Rose, Volker Scheuss

893

894 **Corresponding author**

895 Correspondence to Volker Scheuss ([volker.scheuss@med.uni-muenchen.de](mailto:volker.scheuss@med.uni-muenchen.de)).

## 896 **References**

- 897 Adolfsson A, Ackerman M, Brownstein NC (2019) To cluster, or not to cluster: An analysis of  
898 clusterability methods. *Pattern Recognit* 88:13–26.
- 899 Andermann ML, Kerlin AM, Roumis DK, Glickfeld LL, Reid RC (2011) Functional  
900 specialization of mouse higher visual cortical areas. *Neuron* 72:1025–1039.
- 901 Bekkers JM, Häusser M (2007) Targeted dendrotomy reveals active and passive  
902 contributions of the dendritic tree to synaptic integration and neuronal output. *Proc Natl*  
903 *Acad Sci U S A* 104:11447–11452.
- 904 Benjamini Y, Hochberg Y (1995) Controlling the False Discovery Rate: A Practical and  
905 Powerful Approach to Multiple Testing. *J R Stat Soc Ser B* 57:289–300.
- 906 Bielza C, Benavides-Piccione R, López-Cruz P, Larrañaga P, Defelipe J (2014) Branching  
907 angles of pyramidal cell dendrites follow common geometrical design principles in  
908 different cortical areas. *Sci Rep* 4:1–7.
- 909 Brainard DH (1997) The Psychophysics Toolbox. *Spat Vis* 10:433–436.
- 910 Callaway EM, Katz LC (1993) Photostimulation using caged glutamate reveals functional  
911 circuitry in living brain slices. *Proc Natl Acad Sci U S A* 90:7661–7665.
- 912 Carandini M, Ferster D (2000) Membrane potential and firing rate in cat primary visual  
913 cortex. *J Neurosci* 20:470–484.
- 914 Cuntz H, Forstner F, Borst A, Häusser M (2011) The TREES toolbox-probing the basis of  
915 axonal and dendritic branching. *Neuroinformatics* 9:91–96.
- 916 Dantzker JL, Callaway EM (2000) Laminar sources of synaptic input to cortical inhibitory  
917 interneurons and pyramidal neurons. *Nat Neurosci* 3:701–707.
- 918 Deitcher Y, Eyal G, Kanari L, Verhoog MB, Atenekeng Kahou GA, Mansvelder HD, de Kock  
919 CPJ, Segev I (2017) Comprehensive Morpho-Electrotonic Analysis Shows 2 Distinct  
920 Classes of L2 and L3 Pyramidal Neurons in Human Temporal Cortex. *Cereb Cortex*  
921 27:5398–5414.
- 922 Gouwens NW et al. (2019) Classification of electrophysiological and morphological neuron  
923 types in the mouse visual cortex. *Nat Neurosci* 22:1182–1195.
- 924 Günay C, Edgerton JR, Li S, Sangrey T, Prinz AA, Jaeger D (2009) Database analysis of  
925 simulated and recorded electrophysiological datasets with PANDORA's toolbox.  
926 *Neuroinformatics* 7:93–111.
- 927 Gur M, Snodderly DM (2008) Physiological differences between neurons in layer 2 and layer  
928 3 of primary visual cortex (V1) of alert macaque monkeys. *J Physiol* 586:2293–2306.
- 929 Harris KD, Mrsic-Flogel TD (2013) Cortical connectivity and sensory coding. *Nature* 503:51–  
930 58.
- 931 Harris KD, Shepherd GMG (2015) The neocortical circuit: Themes and variations. *Nat*  
932 *Neurosci* 18:170–181.
- 933 Hartigan JA (1985) The dip test of unimodality. *Ann Stat* 13:70–84.
- 934 Jiang X, Shen S, Cadwell CR, Berens P, Sinz F, Ecker AS, Patel S, Tolias AS (2015)  
935 Principles of connectivity among morphologically defined cell types in adult neocortex.  
936 *Science* (80- ) 350:6264.
- 937 Kanari L, Ramaswamy S, Shi Y, Morand S, Meystre J, Perin R, Abdellah M, Wang Y, Hess  
938 K, Markram H (2019) Objective Morphological Classification of Neocortical Pyramidal

- 939 Cells. *Cereb Cortex* 29:1719–1735.
- 940 Kätzel D, Zemelman B V., Buetfering C, Wölfel M, Miesenböck G (2011) The columnar and  
941 laminar organization of inhibitory connections to neocortical excitatory cells. *Nat*  
942 *Neurosci* 14:100–109.
- 943 Kerlin AM, Andermann ML, Berezovskii VK, Reid RC (2010) Broadly Tuned Response  
944 Properties of Diverse Inhibitory Neuron Subtypes in Mouse Visual Cortex. *Neuron*  
945 67:858–871.
- 946 Kim EJ, Juavinett AL, Kyubwa EM, Jacobs MW, Callaway EM (2015) Three Types of  
947 Cortical Layer 5 Neurons That Differ in Brain-wide Connectivity and Function. *Neuron*  
948 88:1253–1267.
- 949 Kim EJ, Zhang Z, Huang L, Ito-Cole T, Jacobs MW, Juavinett AL, Senturk G, Hu M, Ku M,  
950 Ecker JR, Callaway EM (2020) Extraction of Distinct Neuronal Cell Types from within a  
951 Genetically Continuous Population. *Neuron* 107:274-282.e6.
- 952 Kim MH, Znamenskiy P, Iacaruso MF, Mrsic-Flogel TD (2018) Segregated Subnetworks of  
953 Intracortical Projection Neurons in Primary Visual Cortex. *Neuron* 100:1313-1321.e6.
- 954 Kreile AK, Bonhoeffer T, Hübener M (2011) Altered visual experience induces instructive  
955 changes of orientation preference in mouse visual cortex. *J Neurosci* 31:13911–13920.
- 956 Larkman A, Mason A (1990) Correlations between morphology and electrophysiology of  
957 pyramidal neurons in slices of rat visual cortex. I. Establishment of cell classes. *J*  
958 *Neurosci* 10:1407–1414.
- 959 Leinweber M, Zmarz P, Buchmann P, Argast P, Hübener M, Bonhoeffer T, Keller GB (2014)  
960 Two-photon calcium imaging in mice navigating a virtual reality environment. *J Vis Exp*  
961 84:1–6.
- 962 Luo H, Hasegawa K, Liu M, Song W-J (2017) Comparison of the Upper Marginal Neurons of  
963 Cortical Layer 2 with Layer 2/3 Pyramidal Neurons in Mouse Temporal Cortex. *Front*  
964 *Neuroanat* 11:115.
- 965 Mainen ZF, Sejnowski TJ (1996) Influence of dendritic structure on firing pattern in model  
966 neocortical neurons. *Nature* 382:363–366.
- 967 Marshel JH, Garrett ME, Nauhaus I, Callaway EM (2011) Functional specialization of seven  
968 mouse visual cortical areas. *Neuron* 72:1040–1054.
- 969 McInnes L, Healy J, Melville J (2018) UMAP: Uniform Manifold Approximation and Projection  
970 for Dimension Reduction.
- 971 Meng X, Winkowski DE, Kao JPY, Kanold PO (2017) Sublaminar Subdivision of Mouse  
972 Auditory Cortex Layer 2/3 Based on Functional Translaminar Connections. *J Neurosci*  
973 37:10200–10214.
- 974 Morgenstern NA, Bourg J, Petreanu L (2016) Multilaminar networks of cortical neurons  
975 integrate common inputs from sensory thalamus.
- 976 Niell CM, Stryker MP (2008) Highly selective receptive fields in mouse visual cortex. *J*  
977 *Neurosci* 28:7520–7536.
- 978 O'Herron P, Levy M, Woodward JJ, Kara P (2020) An Unexpected Dependence of Cortical  
979 Depth in Shaping Neural Responsiveness and Selectivity in Mouse Visual Cortex.  
980 *eneuro*:ENEURO.0497-19.2020.
- 981 Peng H et al. (2021) Morphological diversity of single neurons in molecularly defined cell  
982 types. *Nat* 2021 5987879 598:174–181.

- 983 Petersen CCH, Crochet S (2013) Synaptic Computation and Sensory Processing in  
984 Neocortical Layer 2/3. *Neuron* 78:28–48.
- 985 Petreanu L, Mao T, Sternson SM, Svoboda K (2009) The subcellular organization of  
986 neocortical excitatory connections. *Nature* 457:1142–1145.
- 987 Pologruto TA, Sabatini BL, Svoboda K (2003) ScanImage: Flexible software for operating  
988 laser scanning microscopes. *Biomed Eng Online* 2:13.
- 989 Rose T, Jaepel J, Hübener M, Bonhoeffer T (2016) Cell-specific restoration of stimulus  
990 preference after monocular deprivation in the visual cortex. *Science* (80- ) 352:1319–  
991 1322.
- 992 Rossi LF, Harris KD, Carandini M (2020) Spatial connectivity matches direction selectivity in  
993 visual cortex. *Nature* 588:648–652.
- 994 Scala F, Kobak D, Bernabucci M, Bernaerts Y, Cadwell CR, Castro JR, Hartmanis L, Jiang  
995 X, Laturnus S, Miranda E, Mulherkar S, Tan ZH, Yao Z, Zeng H, Sandberg R, Berens  
996 P, Tolias AS (2021) Phenotypic variation of transcriptomic cell types in mouse motor  
997 cortex. *Nat* 2020 5987879 598:144–150.
- 998 Schindelin J, Arganda-Carreras I, Frise E, Kaynig V, Longair M, Pietzsch T, Preibisch S,  
999 Rueden C, Saalfeld S, Schmid B, Tinevez JY, White DJ, Hartenstein V, Eliceiri K,  
1000 Tomancak P, Cardona A (2012) Fiji: An open-source platform for biological-image  
1001 analysis. *Nat Methods* 9:676–682.
- 1002 Shepherd GMG, Stepanyants A, Bureau I, Chklovskii D, Svoboda K (2005) Geometric and  
1003 functional organization of cortical circuits. *Nat Neurosci* 8:782–790.
- 1004 Shepherd GMG, Svoboda K (2005) Laminar and columnar organization of ascending  
1005 excitatory projections to layer 2/3 pyramidal neurons in rat barrel cortex. *J Neurosci*  
1006 25:5670–5679.
- 1007 Staiger JF, Bojak I, Miceli S, Schubert D (2015) A gradual depth-dependent change in  
1008 connectivity features of supragranular pyramidal cells in rat barrel cortex. *Brain Struct*  
1009 220:1317–1337.
- 1010 Suter BA, O'Connor T, Iyer V, Petreanu LT, Hooks BM, Kiritani T, Svoboda K, Shepherd  
1011 GMG (2010) Ephus: Multipurpose data acquisition software for neuroscience  
1012 experiments. *Front Neural Circuits* 4:1–12.
- 1013 Tasic B et al. (2016) Adult mouse cortical cell taxonomy revealed by single cell  
1014 transcriptomics. *Nat Neurosci* 19:335–346.
- 1015 Tasic B et al. (2018) Shared and distinct transcriptomic cell types across neocortical areas.  
1016 *Nature* 563:72–78.
- 1017 Tyler WA, Medalla M, Guillamon-Vivancos T, Luebke JI, Haydar TF (2015) Neural precursor  
1018 lineages specify distinct neocortical pyramidal neuron types. *J Neurosci* 35:6142–6152.
- 1019 Van Aerde KI, Feldmeyer D (2015) Morphological and physiological characterization of  
1020 pyramidal neuron subtypes in rat medial prefrontal cortex. *Cereb Cortex* 25:788–805.
- 1021 Vélez-Fort M, Rousseau C V., Niedworok CJ, Wickersham IR, Rancz EA, Brown APY, Strom  
1022 M, Margrie TW (2014) The stimulus selectivity and connectivity of layer six principal  
1023 cells reveals cortical microcircuits underlying visual processing. *Neuron* 83:1431–1443.
- 1024 Weiler S, Bauer J, Hübener M, Bonhoeffer T, Rose T, Scheuss V (2018) High-yield in vitro  
1025 recordings from neurons functionally characterized in vivo. *Nat Protoc* 13:1275–1293.
- 1026 Weiler S, Nilo DG, Bonhoeffer T, Hübener M, Rose T, Scheuss V (2020) Relationship

1027            between input connectivity, morphology and orientation tuning of layer 2/3 pyramidal  
1028            cells in mouse visual cortex. bioRxiv:2020.06.03.127191.

1029            Xu X, Olivas ND, Ikrar T, Peng T, Holmes TC, Nie Q, Shi Y (2016) Primary visual cortex  
1030            shows laminar-specific and balanced circuit organization of excitatory and inhibitory  
1031            synaptic connectivity. J Physiol 594:1891–1910.

1032            Yao Z et al. (2021) A taxonomy of transcriptomic cell types across the isocortex and  
1033            hippocampal formation. Cell 184:1–20.

1034            Zaitsev A V., Povysheva N V., Gonzalez-Burgos G, Lewis DA (2012) Electrophysiological  
1035            classes of layer 2/3 pyramidal cells in monkey prefrontal cortex. J Neurophysiol  
1036            108:595–609.

1037

1038

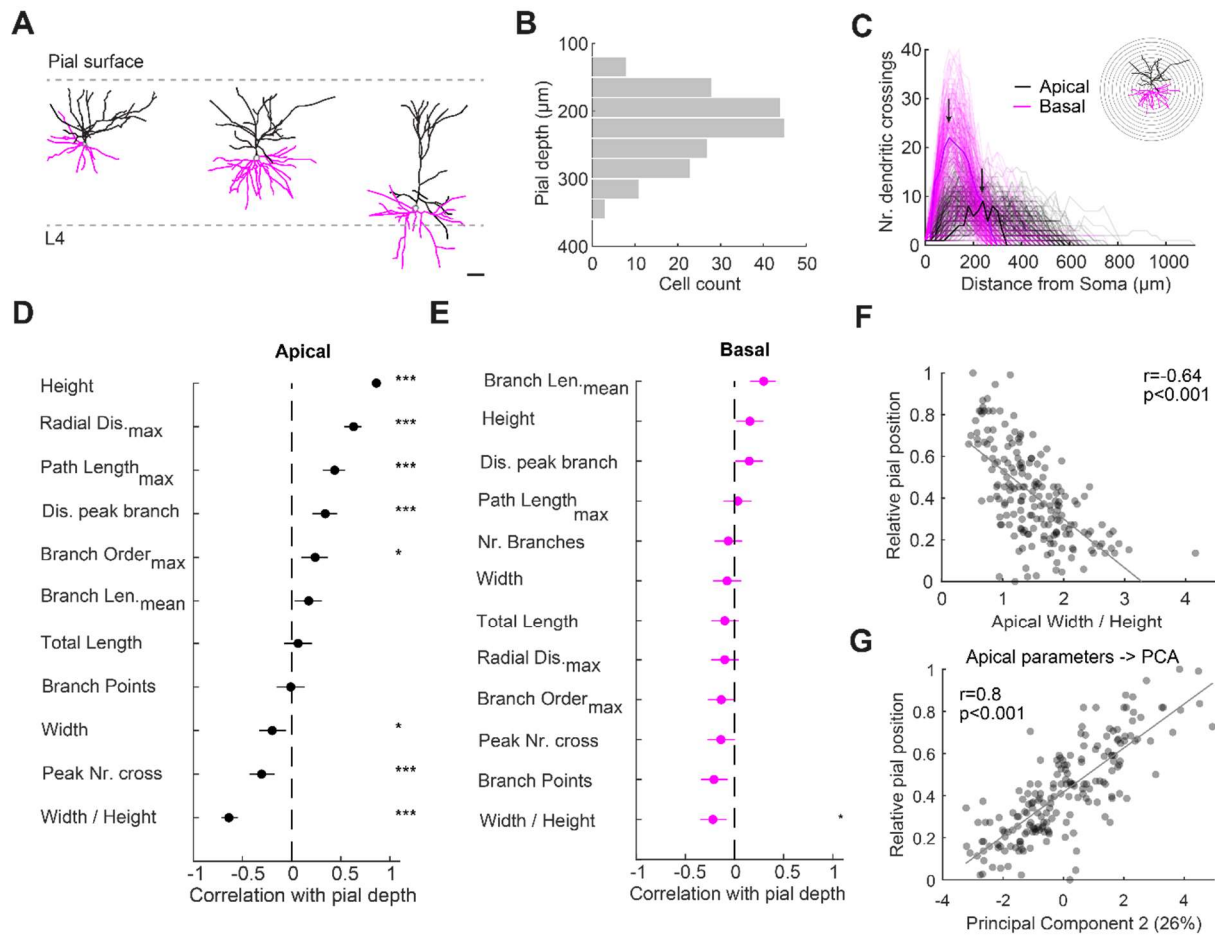

1039  
1040  
1041  
1042  
1043  
1044  
1045  
1046  
1047  
1048  
1049  
1050  
1051  
1052  
1053  
1054  
1055  
1056  
1057

**Figure 1:** Apical but not basal dendritic morphology of L2/3 PyrCs changes with pial depth

**A** Reconstructed dendritic morphology of PyrCs in the upper, middle, and lower part of L2/3 (scale bar: 50  $\mu\text{m}$ ). Apical dendrites, black, basal dendrites, magenta. **B** Distribution of distances to the pial surface of morphologically reconstructed neurons within L2/3. **C** Sholl analysis for apical and basal dendrites. The number of crossings was determined using concentric spheres centered around the soma with 20  $\mu\text{m}$  increments. Bold lines refer to the example cell in inset. Arrows indicate the peak number of crossings for the example cell. **D** Correlations between apical dendritic tree parameters and pial depth sorted in descending order. Error bars are 95% confidence intervals. Asterisks indicate significant correlations. Multiple comparison corrected using Benjamini & Hochberg procedure with false discovery rate (FDR) of 0.05 (Benjamini and Hochberg, 1995). **E** Same as D for basal dendrite parameters. **F** Relative soma position within L2/3 (0 - top, 1 - bottom of L2/3) plotted against ratio of width over height of the apical tree. Linear fit is indicated in grey. Pearson correlation coefficient  $r$  indicated at top right. **G** Relative soma position within L2/3 plotted against principal component 2 weight for apical tree morphology. Percentage indicates variance explained by this principal component. Linear fit is indicated in grey. All data presented is from  $n=189$  cells, from 76 mice.

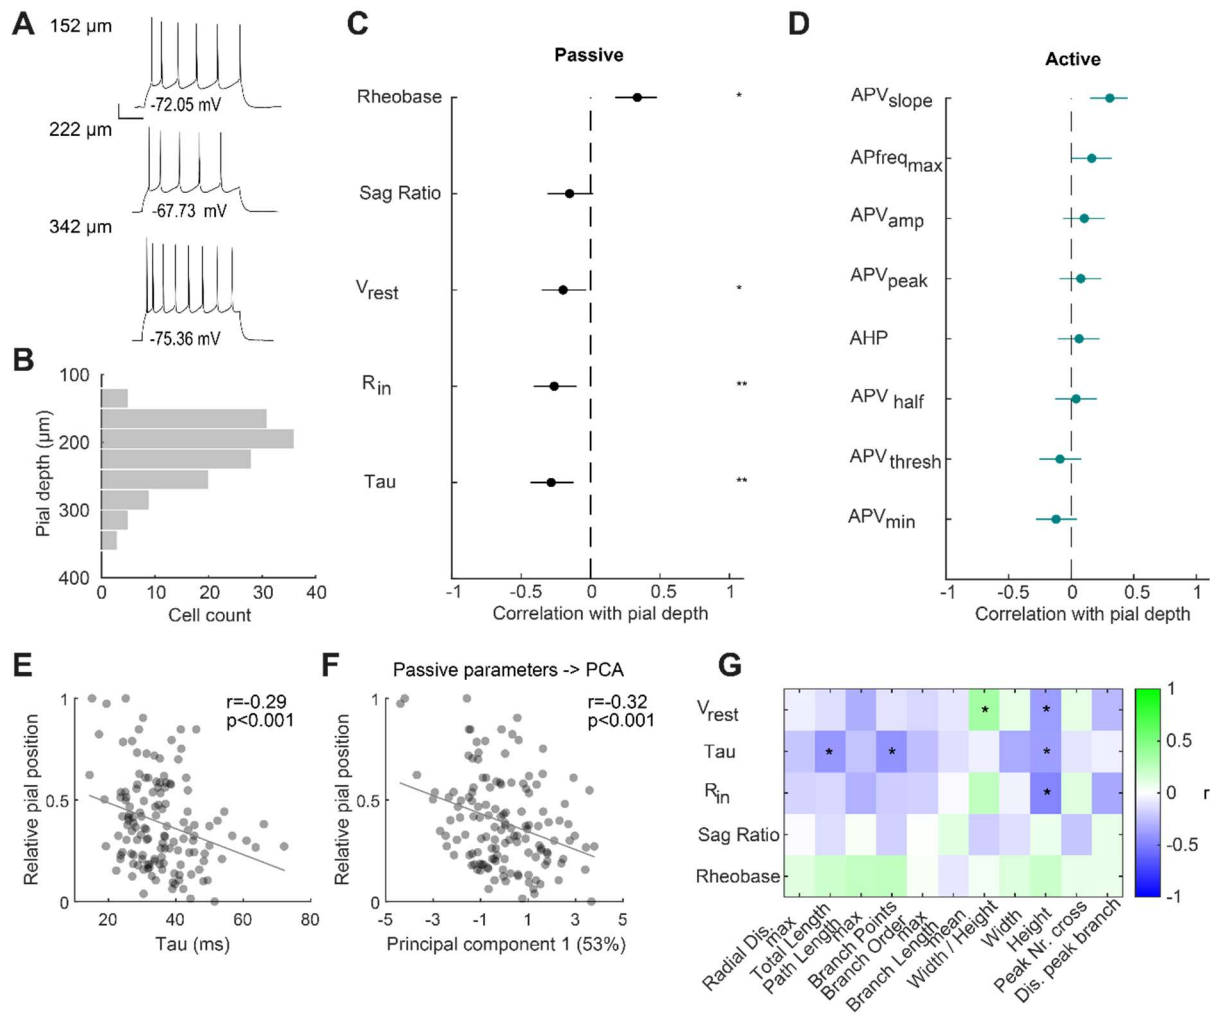

**Figure 2:** Passive but not active electrophysiological properties change with pial depth

**A** Voltage response to a depolarizing step current (Rheobase +30 pA) of three representative L2/3 PyrCs at increasing pial depth (scale bars: 10 mV, 10 ms). **B** Distribution of distances to the pial surface of electrophysiologically characterized neurons within L2/3 (n=137, from 41 mice). **C** Correlations between passive intrinsic properties and pial depth sorted in descending order. Error bars are 95% confidence intervals. Asterisks indicate significant correlations. Multiple comparison corrected using Benjamini & Hochberg procedure with FDR of 0.05. **D** Same as C for active electrophysiological properties. **E** Relative soma position within L2/3 plotted against membrane time constant. Linear fit is indicated in grey. Pearson correlation coefficient r indicated at top right. **F** Relative soma position within L2/3 plotted against PC1 weight for passive intrinsic properties. Percentage indicates variance explained by this principal component. **G** Correlations between morphological parameters for apical tree and passive intrinsic properties (n=32 cells, from 14 mice). Color indicates the Pearson correlation coefficient between the pair of parameters according to the color bar on the right. Asterisks indicate significant correlations.

1058  
1059  
1060  
1061  
1062  
1063  
1064  
1065  
1066  
1067  
1068  
1069  
1070  
1071  
1072  
1073  
1074



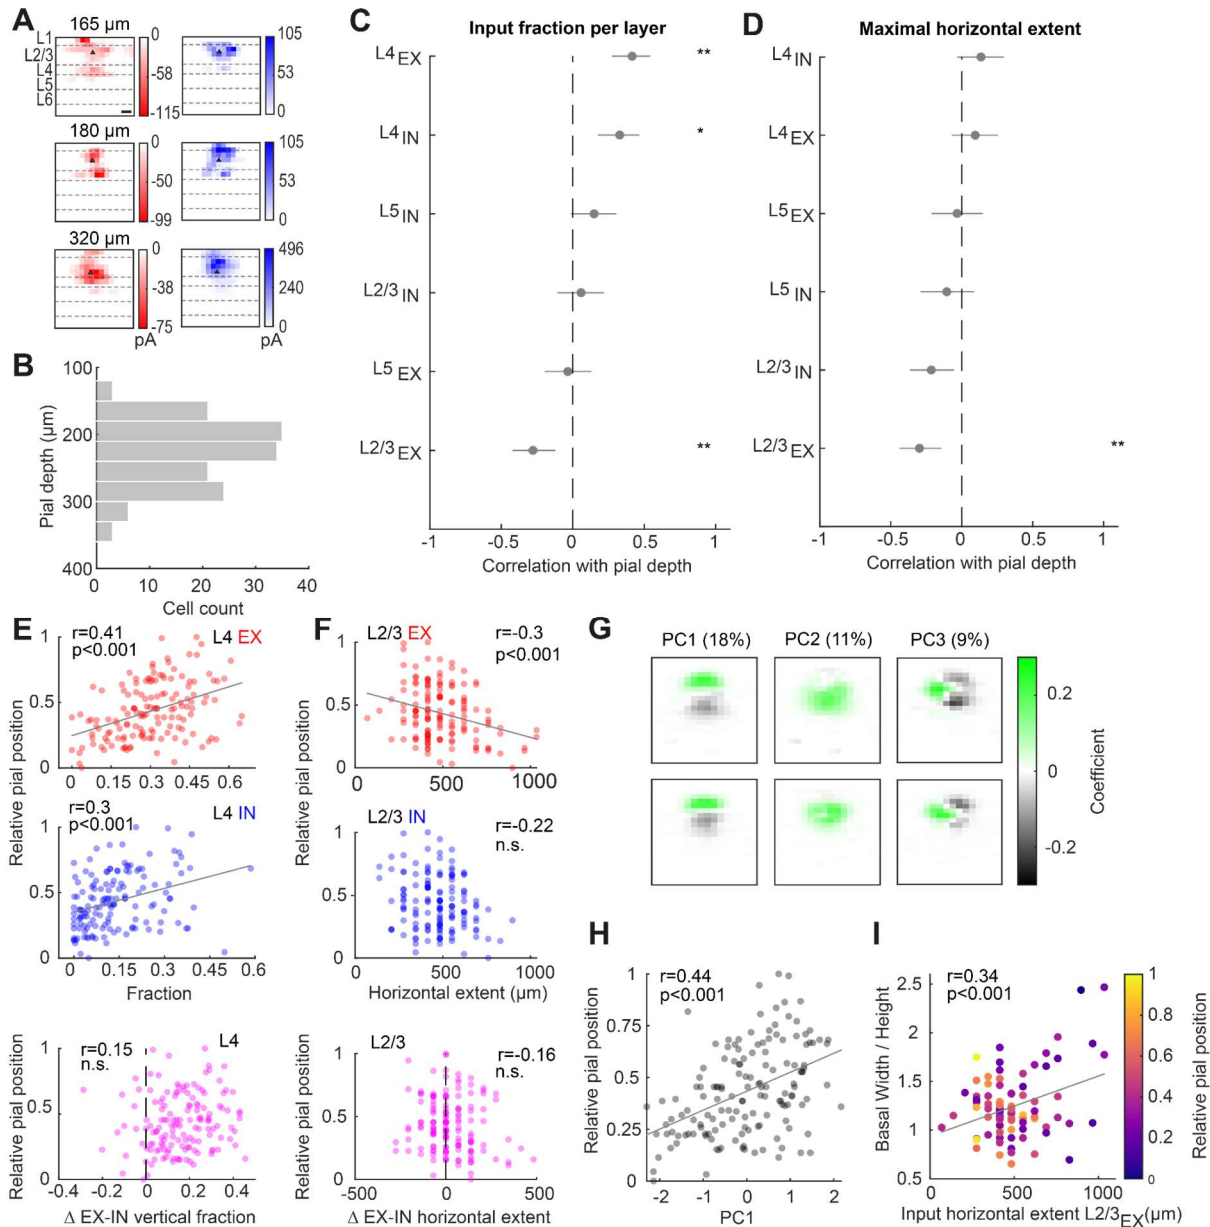

**Figure 3: Functional intra- and interlaminar excitatory and inhibitory input connectivity changes with pial depth**

**A** Representative, peak normalized excitatory (red) and inhibitory (blue) input maps for PyrCs in the upper, middle, and lower part of L2/3 (scale bar 100  $\mu\text{m}$ ). **B** Distribution of distances to the pial surface of functionally mapped neurons within L2/3 ( $n=147$ , from 56 mice). **C** Correlations between excitatory and inhibitory input fractions per layer and pial depth sorted in descending order. Error bars are 95% confidence intervals. Asterisks indicate significant correlations. Multiple comparison corrected using Benjamini & Hochberg procedure, FDR=0.05. **D** Same as **C** for the maximal horizontal extent of input from each layer. **E** Relative pial depth plotted against excitatory (top) and inhibitory (middle) input fractions arising from L4 as well as difference of both (bottom) ( $n=147$  cells, from 56 mice). Pearson correlation coefficient  $r$  indicated at top of each plot. Linear fit is indicated in grey. **F** Same as **E** for maximal horizontal extent of excitatory and inhibitory input from L2/3. **G** Input maps of the first three principal component eigenvalues. Principal component analysis (PCA) using the combined  $16 \times 16$  normalized excitatory and inhibitory input maps. Before performing PCA, the input maps were vertically and horizontally aligned (see Methods). Explained variance for each principal component is indicated at top. **H** Pial depth plotted against PC1 weight ( $n=147$  cells, from 56 mice). Linear fit is indicated in grey. **I** Ratio of width over height of the basal tree plotted against maximal horizontal extent of excitatory input from L2/3. Color indicates relative soma position within L2/3 according to the color bar on the right ( $n=97$  cells, from 47 mice). For **E**, **F**, **H** and **I**, the Pearson correlation coefficient  $r$  is indicated at the top.

1075  
1076  
1077  
1078  
1079  
1080  
1081  
1082  
1083  
1084  
1085  
1086  
1087  
1088  
1089  
1090  
1091  
1092  
1093  
1094  
1095  
1096

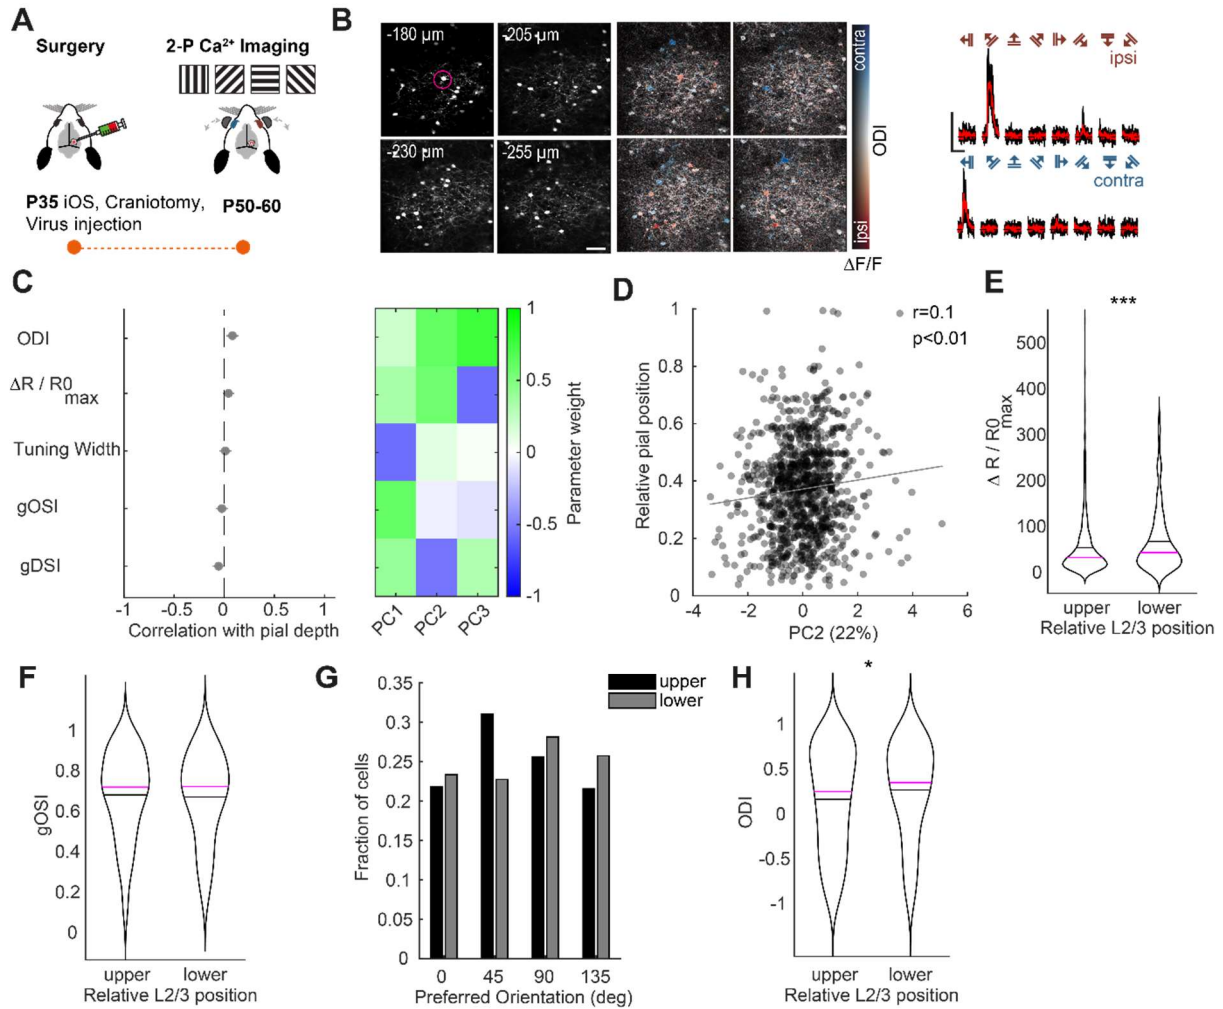

**Figure 4:** *In vivo* response amplitude and ocular dominance are different between upper and lower L2/3 PyrCs in binocular V1

**A** Experimental pipeline for *in vivo* 2-photon calcium imaging experiments: Binocular visual cortex was identified through the skull by using intrinsic optical signal imaging (iOS, see (Weiler et al., 2018)). Viral injections were then placed into bV1 and a cranial window implanted. After 2-3 weeks of viral expression, moving gratings of different orientations and directions were displayed in front of the mouse. Shutters allow for independent stimulation of either eye. **B** Example image volumes for one animal (four slices acquired with image plane depth increment of 25  $\mu\text{m}$ , scale bar: 50  $\mu\text{m}$ ). Left, structural channel: frame-averaged mRuby2 fluorescence. Middle, color-coded response map of individual L2/3 PyrCs. Red and blue hues indicate ipsilateral (ODI<0) and contralateral dominance (ODI>0), respectively. Right, calcium transients of an example neuron in response to ipsi- or contralateral eye stimulation (scale bars:  $\Delta R/R_0=200\%$ , 10 s). **C** Left, correlations between visually evoked response features (global orientation and direction selectivity index, gOSI and gDSI, respectively; ocular dominance index, ODI; maximal response to preferred orientation,  $R/R_{0\text{max}}$ ) and pial depth sorted in descending order. Error bars are 95% confidence intervals (gOSI, gDSI, tuning width:  $n=1216$  cells, 32 mice; ODI,  $R/R_{0\text{max}}$ :  $n=1103$  cells, from 32 mice). Multiple comparison corrected using Benjamini & Hochberg procedure, FDR=0.05. Right, contributions of the five visually evoked response parameters to the first three principal components. **D** Pial depth plotted against PC2 weight. Pearson correlation coefficient  $r$  indicated at top left. Linear fit is indicated in grey ( $n=1021$  cells, from 32 mice). **E** Violin plots of maximal response amplitude for upper and lower L2/3 PyrCs in bV1. Black line indicates mean, magenta line indicates median ( $n=908$  cells for upper,  $n=226$  cells for lower part, from 32 mice). Asterisks indicate significant difference. **F** Same as E for the global orientation selectivity index (gOSI,  $n=908$ ,  $n=226$  cells, from 32 mice). **G** Distribution of preferred orientation for upper and lower L2/3 PyrCs. **H** Violin plots of ocular dominance index (ODI) for upper and lower L2/3 PyrCs. Black line indicates mean, magenta line indicates median ( $n=908$ ,  $n=226$  cells, from 32 mice). Asterisks indicate significant difference.

1097  
1098  
1099  
1100  
1101  
1102  
1103  
1104  
1105  
1106  
1107  
1108  
1109  
1110  
1111  
1112  
1113  
1114  
1115  
1116  
1117  
1118  
1119  
1120  
1121  
1122  
1123  
1124

1125  
1126

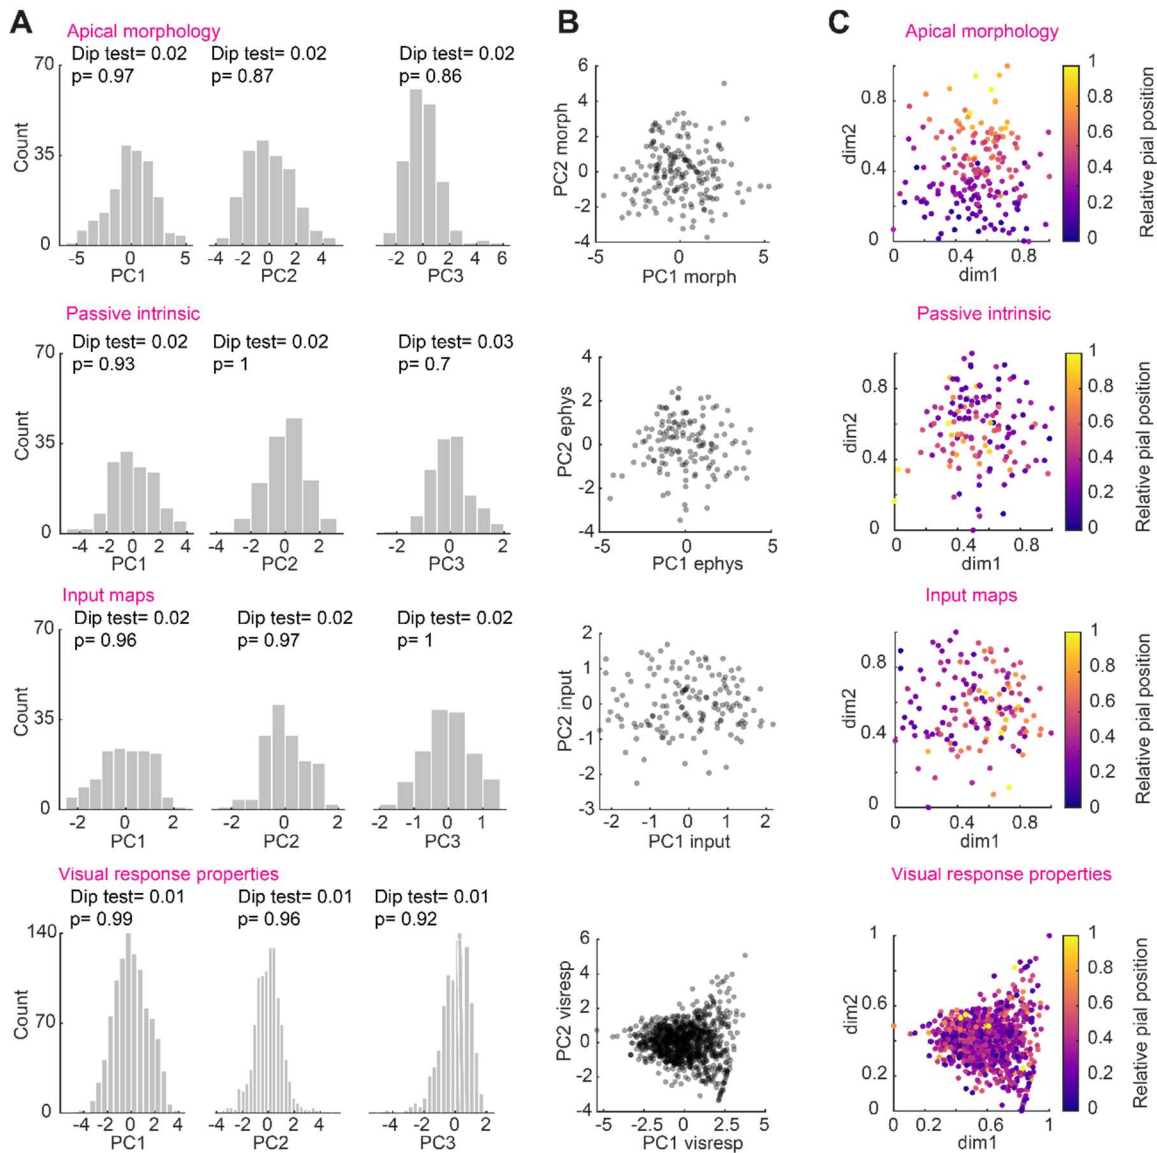

1127  
1128  
1129  
1130  
1131  
1132  
1133  
1134  
1135  
1136  
1137  
1138  
1139

**Figure 5:** Continuum-like variation of dendritic morphology, passive electrophysiological properties, functional input and visually evoked response properties with pial depth

**A** Distribution of principal component weights and Dip test results for multimodality for the first three principal components calculated for apical tree morphology, passive intrinsic properties, functional excitatory and inhibitory input maps and visually evoked response properties (from top to bottom). **B** Principal component weights PC1 and PC2 from A plotted against each other. **C** UMAP projections color-coded for relative pial position. The UMAP embedding was performed using the first three principal component weights of the respective data sets. Dimension 1 (dm1) and 2 (dm2) are plotted. Data sets from top to bottom: n=189 cells, from 76 mice; n=137 cells, from 41 mice; n=147 cells, from 56 mice; n=1021 cells, from 32 mice.

| #  | Description                                                   | Mean $\pm$ SEM             | PC1   | PC2   | PC3   |
|----|---------------------------------------------------------------|----------------------------|-------|-------|-------|
|    | <b>Apical dendrite</b>                                        |                            |       |       |       |
| 1  | Radial Dis <sub>max</sub> : Maximal radial distance from soma | 223.94 $\pm$ 3.47 $\mu$ m  | 0.28  | 0.47  | 0.23  |
| 2  | Total length: Total length of tree                            | 2015.1 $\pm$ 46.28 $\mu$ m | 0.36  | -0.08 | 0.39  |
| 3  | Path Length <sub>max</sub> : Maximal path length from soma    | 173.6 $\pm$ 3.99 $\mu$ m   | 0.07  | -0.08 | 0.21  |
| 4  | Branch Points: Number of branch points                        | 16.4 $\pm$ 0.4             | -0.29 | -0.2  | 0.31  |
| 5  | Branch Order <sub>max</sub> : Maximal branch order            | 7.98 $\pm$ 0.15            | 0.49  | -0.25 | -0.1  |
| 6  | Branch Length <sub>mean</sub> : Mean branch length            | 59.6 $\pm$ 0.68 $\mu$ m    | -0.35 | 0.12  | 0.29  |
| 7  | Width / Height: Width / Height of tree                        | 1.5 $\pm$ 0.04             | 0     | 0.06  | 0.73  |
| 8  | Width: maximal horizontal span                                | 288.91 $\pm$ 6.18 $\mu$ m  | 0.32  | -0.32 | 0.14  |
| 9  | Height: maximal vertical span                                 | 217.72 $\pm$ 4.18 $\mu$ m  | -0.44 | -0.19 | 0.05  |
| 10 | Peak Nr. Cross: Peak number of crossing (Sholl Analysis)      | 11.09 $\pm$ 0.26           | -0.21 | -0.2  | 0.03  |
| 11 | Dis. Peak branch: Distance to peak crossing (Sholl Analysis)  | 199.69 $\pm$ 7.93 $\mu$ m  | -0.02 | 0.68  | -0.06 |
|    | <b>Basal dendrite</b>                                         |                            |       |       |       |
| 1  | Radial Dis <sub>max</sub> : Maximal radial distance from soma | 141.06 $\pm$ 3.14 $\mu$ m  | 0.34  | 0.46  | 0.15  |
| 2  | Total length: Total length of tree                            | 2394 $\pm$ 57.37 $\mu$ m   | 0.27  | -0.13 | 0.44  |
| 3  | Path Length <sub>max</sub> : Maximal path length from soma    | 157.04 $\pm$ 7.99 $\mu$ m  | 0.13  | -0.04 | -0.14 |
| 4  | Branch Points: Number of branch points                        | 23.36 $\pm$ 0.6            | -0.33 | -0.01 | 0.41  |
| 5  | Branch Order <sub>max</sub> : Maximal branch order            | 8.33 $\pm$ 0.19            | -0.28 | 0.13  | 0.01  |
| 6  | Branch Length <sub>mean</sub> : Mean branch length            | 49.87 $\pm$ 0.57 $\mu$ m   | 0.28  | -0.28 | 0.02  |
| 7  | Width / Height: Width / Height of tree                        | 1.26 $\pm$ 0.02            | 0.14  | 0.02  | -0.36 |
| 8  | Width: maximal horizontal span                                | 240.22 $\pm$ 4.47 $\mu$ m  | 0.23  | 0.01  | 0.66  |
| 9  | Height: maximal vertical span                                 | 197.19 $\pm$ 3.21 $\mu$ m  | 0.18  | -0.44 | -0.11 |
| 10 | NB: Number of basal trees                                     | 5.86 $\pm$ 0.1 $\mu$ m     | 0.65  | 0.07  | -0.14 |
| 11 | Peak Nr. Cross: Peak number of crossing (Sholl Analysis)      | 21.7 $\pm$ 0.54            | 0.05  | 0.08  | -0.05 |
| 12 | Dis. Peak branch: Distance to peak crossing (Sholl Analysis)  | 125.6 $\pm$ 4.14 $\mu$ m   | 0.03  | 0.69  | -0.05 |

1140

1141

1142

1143

1144

1145

1146

**Table 1** List of parameters used for morphological analysis of apical and basal dendritic trees with their corresponding average values and contributions to the first three principal components from principal component analysis performed separately for apical and basal tree (eigenvalues PC1-PC3, n=189 cells, from 76 mice).

| # | Description                                                   | Mean $\pm$ SEM               | PC1   | PC2   | PC3   |
|---|---------------------------------------------------------------|------------------------------|-------|-------|-------|
| 1 | $V_{rest}$ : Resting membrane potential                       | -71.82 $\pm$ 0.59 mV         | 0.46  | 0.48  | 0.54  |
| 2 | $\tau_m$ : Membrane time constant                             | 35.26 $\pm$ 0.86 ms          | -0.47 | 0.26  | 0.01  |
| 3 | $R_{IN}$ : Input resistance                                   | 122.23 $\pm$ 2.57 M $\Omega$ | -0.25 | 0.71  | -0.52 |
| 4 | Sag ratio: Sag in percentage                                  | 7.06 $\pm$ 0.31 %            | -0.17 | 0.39  | 0.51  |
| 5 | Rheobase: Minimal current necessary to evoke spike            | 115.7 $\pm$ 5 pA             | 0.69  | 0.2   | -0.42 |
| 1 | APV <sub>min</sub> : Minimal membrane voltage during AHP      | -48.81 $\pm$ 0.41 mV         | -0.11 | 0.5   | -0.04 |
| 2 | APV <sub>peak</sub> : Peak membrane voltage of spike          | 46.1 $\pm$ 0.69 mV           | 0.71  | 0.08  | 0.04  |
| 3 | APV <sub>thresh</sub> : Threshold voltage at spike initiation | -33.96 $\pm$ 0.26 mV         | 0.2   | 0.11  | 0.77  |
| 4 | APV <sub>slope</sub> : The maximal slope of the spike         | 141.75 $\pm$ 3.05 mV/ms      | 0     | -0.23 | -0.01 |
| 5 | APV <sub>half</sub> : Membrane voltage at spike half          | 6.07 $\pm$ 0.37 mV           | 0.12  | -0.22 | 0.29  |
| 6 | APV <sub>amp</sub> : Amplitude of the spike                   | 80.06 $\pm$ 0.72 mV          | -0.5  | -0.13 | 0.54  |
| 7 | AHP: Maximal amplitude of AHP                                 | 14.85 $\pm$ 0.41 mV          | 0.39  | -0.44 | 0.07  |
| 8 | APfreqmax: Maximal spike frequency                            | 9.99 $\pm$ 0.37 Hz           | -0.16 | -0.65 | -0.14 |

1147

1148

1149

1150

1151

1152

**Table 2** The 5 passive (black) and 8 active (green) extracted electrophysiological parameters with their corresponding average values and contributions to the first three principal components from principal component analysis performed separately for passive and active electrophysiological parameters (eigenvalues PC1-PC3, n=137 cells from 41 mice).
